# Supplementary material for: Four new phenylethanoid and flavonoid glycoside dimers from the fruits of Forsythia suspensa and their neuroprotective activities
Source: Royal Society of Chemistry journal article supplement (doi:10.1039/c7ra04229a), 2017-01-01
Supplement: c7ra04229a1.pdf [file c7ra04229a1.pdf]

# **Four new phenylethanoid and flavonoid glycoside dimers from the fruits of *Forsythia suspensa* and their neuroprotective activities**

Fan Zhang,<sup>a,b,†</sup> Ya-Nan Yang,<sup>a,‡</sup> Zi-Ming Feng,<sup>a</sup> Jian-Shuang Jiang,<sup>a</sup> and Pei-Cheng  
Zhang<sup>a\*</sup>

<sup>a</sup>*State Key Laboratory of Bioactive Substance and Function of Natural Medicines,  
Institute of Materia Medica, Chinese Academy of Medical Sciences and Peking Union  
Medical College, Beijing 100050, People's Republic of China*

<sup>b</sup>*Beijing Changping Hospital of Integrated Chinese and Western Medicine, Beijing  
102208, People's Republic of China*

## **Supporting information**

## The List of Contents

| No | Content                                                                                                                        | Page |
|----|--------------------------------------------------------------------------------------------------------------------------------|------|
| 1  | <b>Figure S1.</b> Two optimized conformations of <b>1</b> with the population (%)                                              | S3   |
| 2  | <b>Figure S2.</b> The IR spectrum of compound <b>1*</b>                                                                        | S4   |
| 3  | <b>Figure S3.</b> The UV spectrum of compound <b>1*</b>                                                                        | S4   |
| 4  | <b>Figure S4.</b> The <sup>1</sup> H NMR spectrum of compound <b>1*</b> in acetic acid- <i>d</i> <sub>4</sub>                  | S5   |
| 5  | <b>Figure S5.</b> The <sup>13</sup> C NMR spectrum of compound <b>1*</b> in acetic acid- <i>d</i> <sub>4</sub>                 | S5   |
| 6  | <b>Figure S6.</b> The HSQC spectrum of compound <b>1*</b> in acetic acid- <i>d</i> <sub>4</sub>                                | S6   |
| 7  | <b>Figure S7.</b> The HMBC spectrum of compound <b>1*</b> in acetic acid- <i>d</i> <sub>4</sub>                                | S6   |
| 8  | <b>Figure S8.</b> The <sup>1</sup> H- <sup>1</sup> H COSY spectrum of compound <b>1*</b> in acetic acid- <i>d</i> <sub>4</sub> | S7   |
| 9  | <b>Figure S9.</b> The ROESY spectrum of compound <b>1*</b> in acetic acid- <i>d</i> <sub>4</sub>                               | S7   |
| 10 | <b>Figure S10.</b> The TOCSY spectrum of compound <b>1*</b> in acetic acid- <i>d</i> <sub>4</sub>                              | S8   |
| 11 | <b>Figure S11.</b> The CD spectrum of <b>1*</b> in MeOH                                                                        | S8   |
| 12 | <b>Figure S12.</b> The HRESIMS of compound <b>1*</b>                                                                           | S9   |
| 13 | <b>Figure S13.</b> The IR spectrum of compound <b>2*</b>                                                                       | S9   |
| 14 | <b>Figure S14.</b> The UV spectrum of compound <b>2*</b>                                                                       | S10  |
| 15 | <b>Figure S15.</b> The <sup>1</sup> H NMR spectrum of compound <b>2*</b> in methanol- <i>d</i> <sub>4</sub>                    | S10  |
| 16 | <b>Figure S16.</b> The <sup>13</sup> C NMR spectrum of compound <b>2*</b> in methanol- <i>d</i> <sub>4</sub>                   | S11  |
| 17 | <b>Figure S17.</b> The HSQC spectrum of compound <b>2*</b> in methanol- <i>d</i> <sub>4</sub>                                  | S11  |
| 18 | <b>Figure S18.</b> The HMBC spectrum of compound <b>2*</b> in methanol- <i>d</i> <sub>4</sub>                                  | S12  |
| 19 | <b>Figure S19.</b> The <sup>1</sup> H- <sup>1</sup> H COSY spectrum of compound <b>2*</b> in methanol- <i>d</i> <sub>4</sub>   | S12  |
| 20 | <b>Figure S20.</b> The ROESY spectrum of compound <b>2*</b> in methanol- <i>d</i> <sub>4</sub>                                 | S13  |
| 21 | <b>Figure S21.</b> The CD spectrum of <b>2*</b> in MeOH : H <sub>2</sub> O 1:1                                                 | S13  |
| 22 | <b>Figure S22.</b> The HRESIMS of compound <b>2*</b>                                                                           | S14  |
| 23 | <b>Figure S23.</b> The IR spectrum of compound <b>3*</b>                                                                       | S14  |
| 24 | <b>Figure S24.</b> The UV spectrum of compound <b>3*</b>                                                                       | S15  |
| 25 | <b>Figure S25.</b> The <sup>1</sup> H NMR spectrum of compound <b>3*</b> in acetic acid- <i>d</i> <sub>4</sub>                 | S15  |

---

|    |                                                                                                              |     |
|----|--------------------------------------------------------------------------------------------------------------|-----|
| 26 | <b>Figure S26.</b> The $^{13}\text{C}$ NMR spectrum of compound <b>3*</b> in acetic acid- $d_4$              | S16 |
| 27 | <b>Figure S27.</b> The HSQC spectrum of compound <b>3*</b> in acetic acid- $d_4$                             | S16 |
| 28 | <b>Figure S28.</b> The HMBC spectrum of compound <b>3*</b> in acetic acid- $d_4$                             | S17 |
| 29 | <b>Figure S29.</b> The $^1\text{H}$ - $^1\text{H}$ COSY spectrum of compound <b>3*</b> in acetic acid- $d_4$ | S17 |
| 30 | <b>Figure S30.</b> The ROESY spectrum of compound <b>3*</b> in acetic acid- $d_4$                            | S18 |
| 31 | <b>Figure S31.</b> The CD spectrum of <b>3*</b> in MeOH : H <sub>2</sub> O 1:1                               | S18 |
| 32 | <b>Figure S32.</b> The overlay CD spectrum of <b>2*</b> and <b>3*</b>                                        | S19 |
| 33 | <b>Figure S33.</b> The HRESIMS of compound <b>3*</b>                                                         | S19 |
| 34 | <b>Figure S34.</b> The IR spectrum of compound <b>4*</b>                                                     | S20 |
| 35 | <b>Figure S35.</b> The UV spectrum of compound <b>4*</b>                                                     | S20 |
| 36 | <b>Figure S36.</b> The $^1\text{H}$ NMR spectrum of compound <b>4*</b> in acetic acid- $d_4$                 | S21 |
| 37 | <b>Figure S37.</b> The $^{13}\text{C}$ NMR spectrum of compound <b>4*</b> in acetic acid- $d_4$              | S21 |
| 38 | <b>Figure S38.</b> The HSQC spectrum of compound <b>4*</b> in acetic acid- $d_4$                             | S22 |
| 39 | <b>Figure S39.</b> The HMBC spectrum of compound <b>4*</b> in acetic acid- $d_4$                             | S22 |
| 40 | <b>Figure S40.</b> The $^1\text{H}$ - $^1\text{H}$ COSY spectrum of compound <b>4*</b> in acetic acid- $d_4$ | S23 |
| 41 | <b>Figure S41.</b> The ROESY spectrum of compound <b>4*</b> in acetic acid- $d_4$                            | S23 |
| 42 | <b>Figure S42.</b> The CD spectrum of <b>4*</b> in MeOH : H <sub>2</sub> O 1:1                               | S24 |
| 43 | <b>Figure S43.</b> The HRESIMS of compound <b>4*</b>                                                         | S24 |

---

## Experimental section

**Neuroprotective effects of compounds 1-4.** Compounds 1-4 were tested for neuroprotective effects against rotenone-induced injury in PC12 cells using an MTT assay. The PC12 cells were cultured in Dulbecco's modified Eagle's medium supplemented with 5% horse serum, 5% fetal bovine serum. Then, 100  $\mu$ l cells with an initial density of  $5 \times 10^4$  cells/ml were seeded in each well of a poly-L-lysine coated 96-well culture plates and precultured for 24h at 37 °C under a 5% CO<sub>2</sub> atmosphere. Afterwards, the medium were placed by different fresh medium including the control (complete medium), the model (complete medium with 4  $\mu$ M rotenone) and the sample (complete medium with 4  $\mu$ M rotenone and 1  $\mu$ M test samples), and the cells were cultured for 48 h. Then, 10  $\mu$ l MTT (0.5 mg/ml) was added to each well. After incubation for 4 h, the medium was removed and 100  $\mu$ l DMSO was added to dissolve formazan crystals. The optical density (OD) of the PC12 cells was measured on a microplate reader at 550 nm. The cell viability (%) of each sample was calculated by the following formula: Cell viability (%) =  $OD_{(\text{model or sample})} / OD_{\text{control}} \times 100$

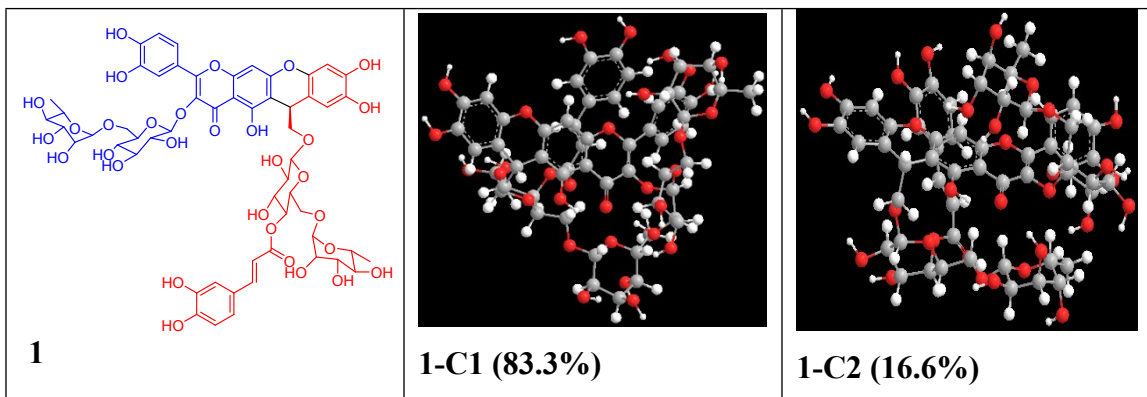

**Figure S1** Two Optimized Conformations of **1** with the Population (%)

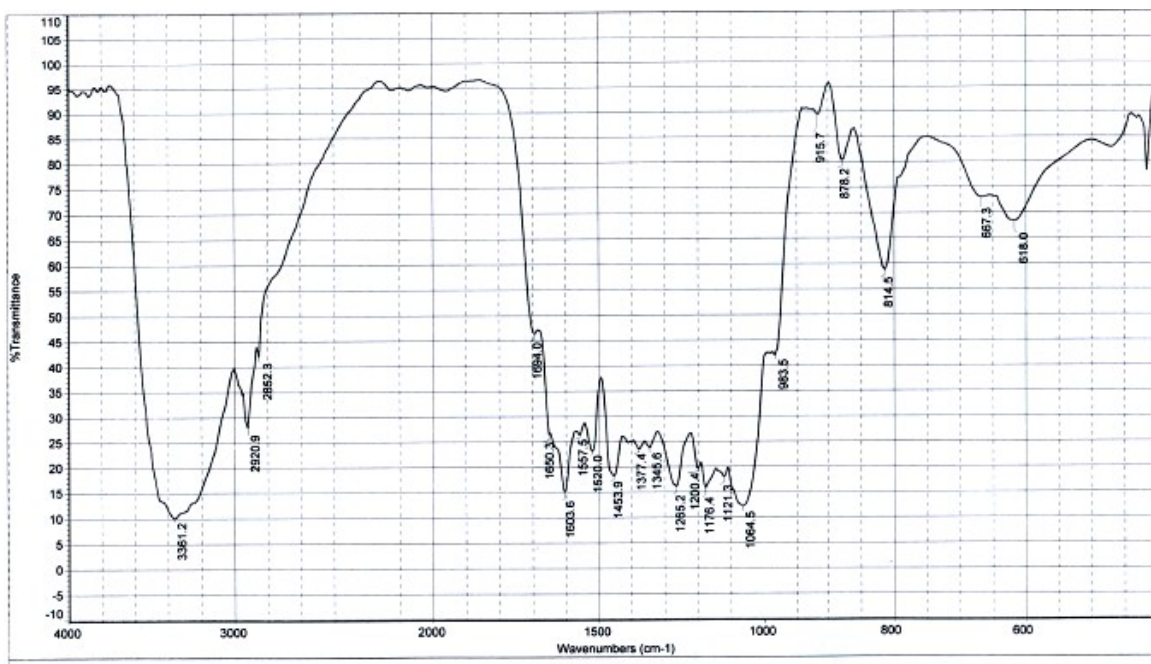

**Figure S2.** The IR spectrum of compound **1\***

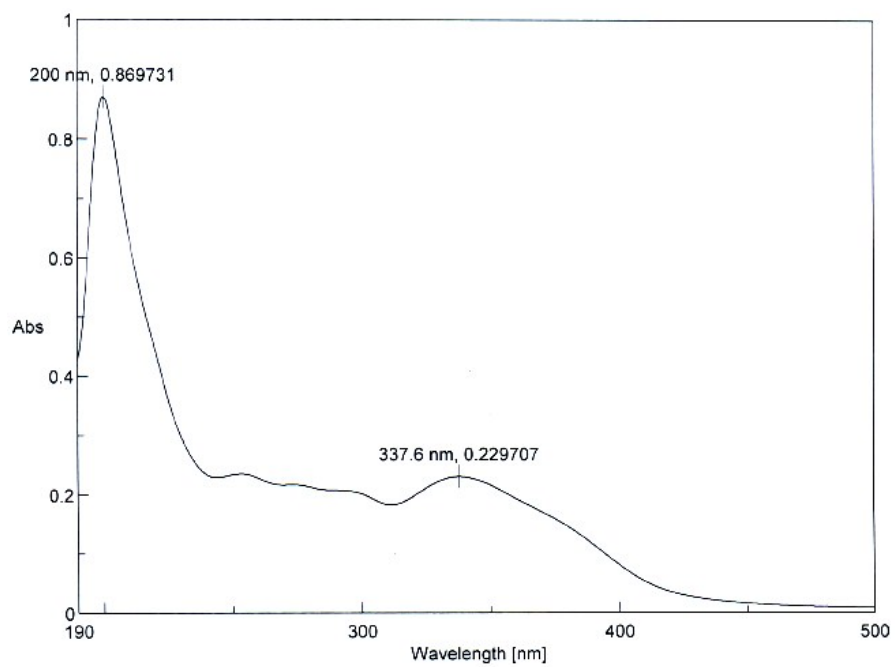

**Figure S3.** The UV spectrum of compound **1\***

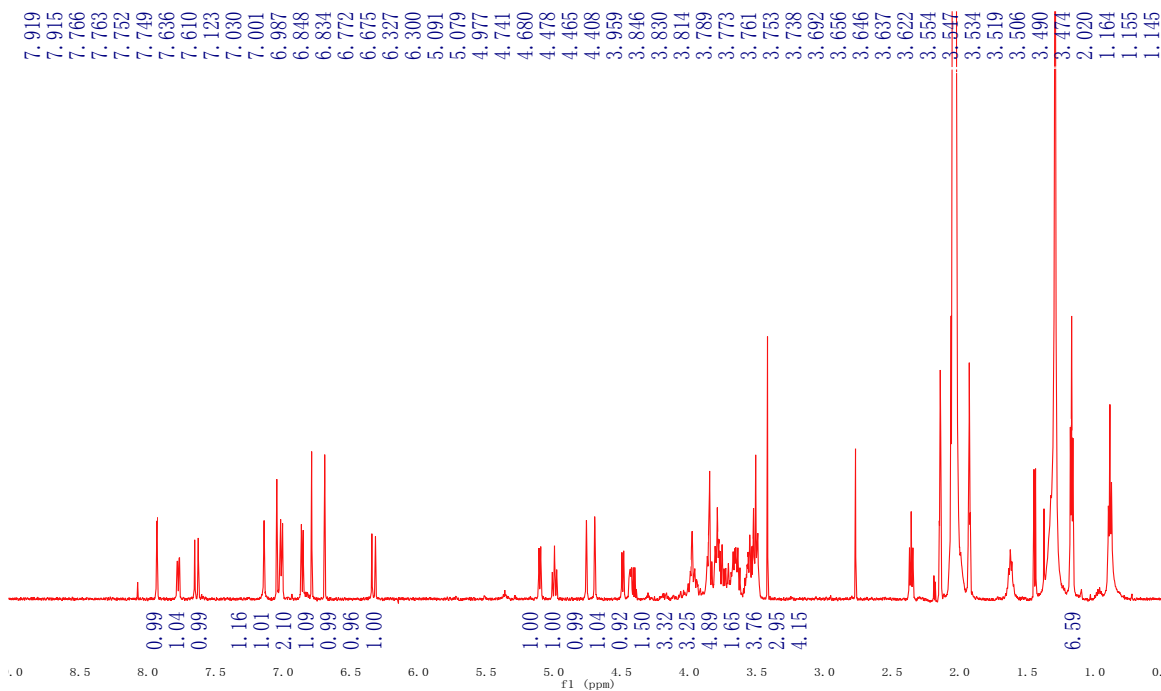

**Figure S4.** The  $^1\text{H}$  NMR spectrum of compound **1\*** in acetic acid- $d_4$

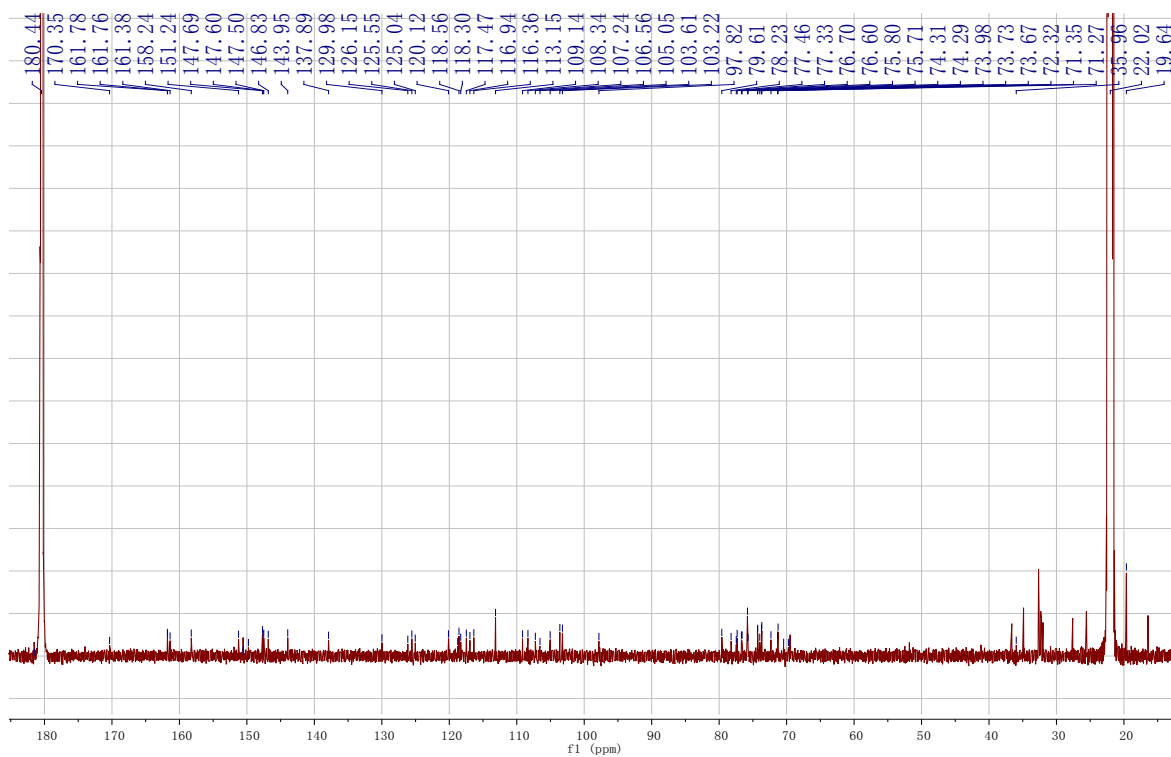

**Figure S5.** The  $^{13}\text{C}$  NMR spectrum of compound **1\*** in acetic acid- $d_4$

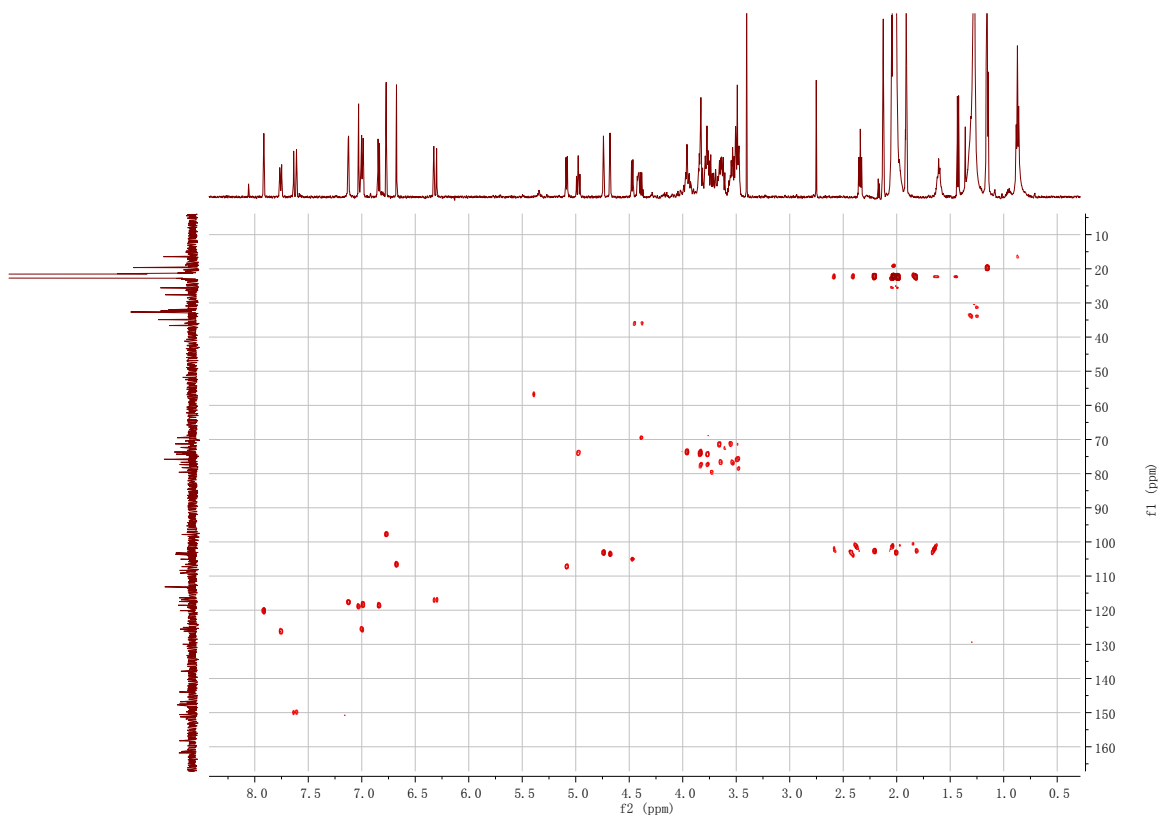

Figure S6. The HSQC spectrum of compound **1\*** in acetic acid- $d_4$

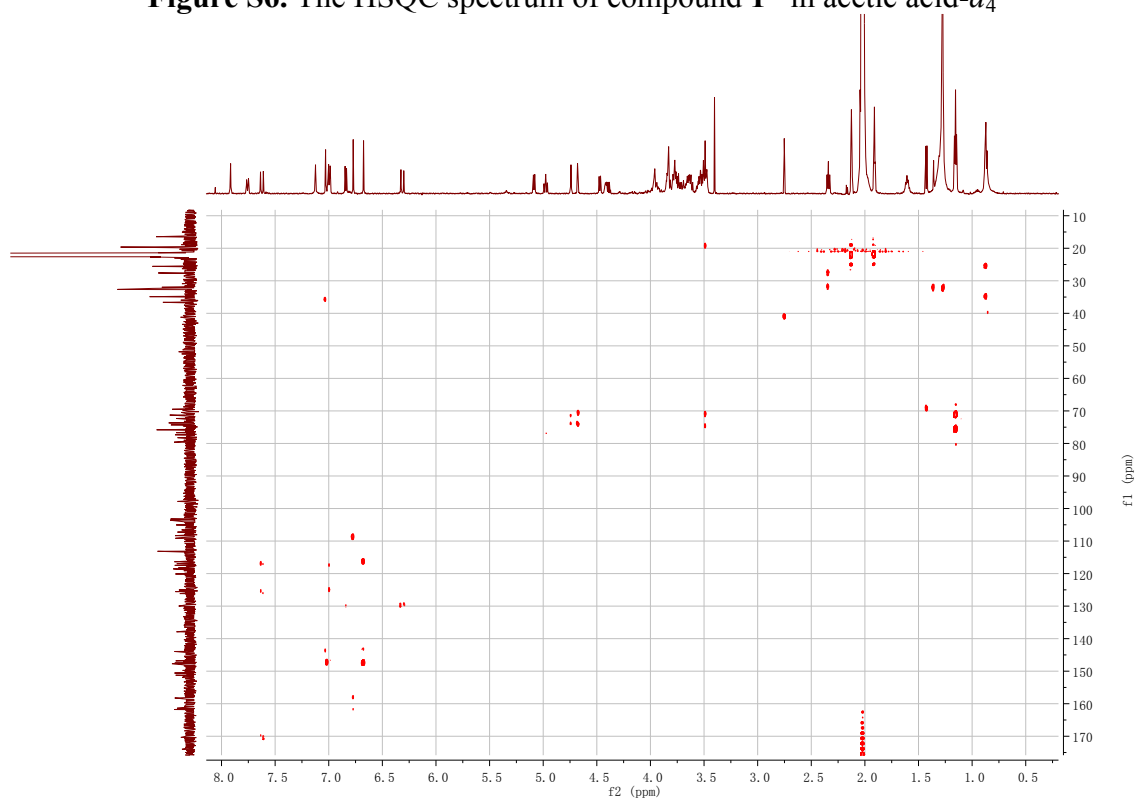

Figure S7. The HMBC spectrum of compound **1\*** in acetic acid- $d_4$

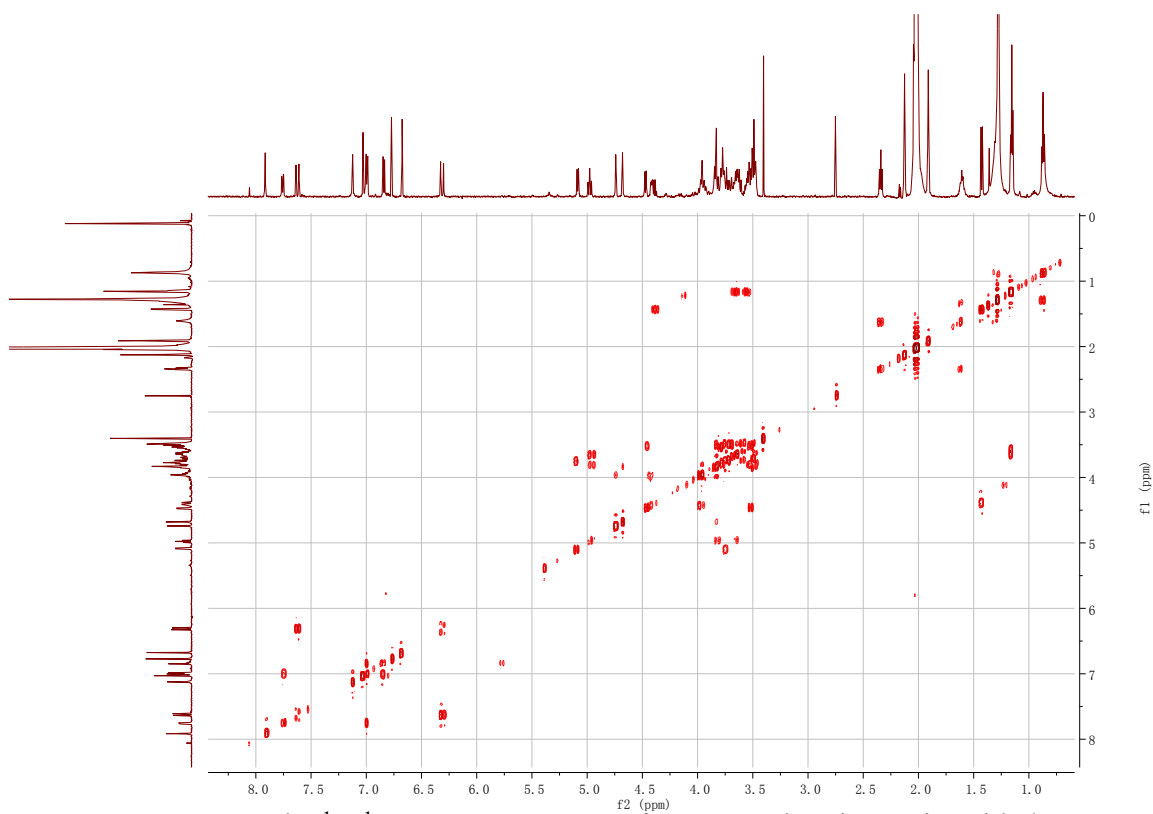

**Figure S8.** The  $^1\text{H}$ - $^1\text{H}$  COSY spectrum of compound **1\*** in acetic acid- $d_4$

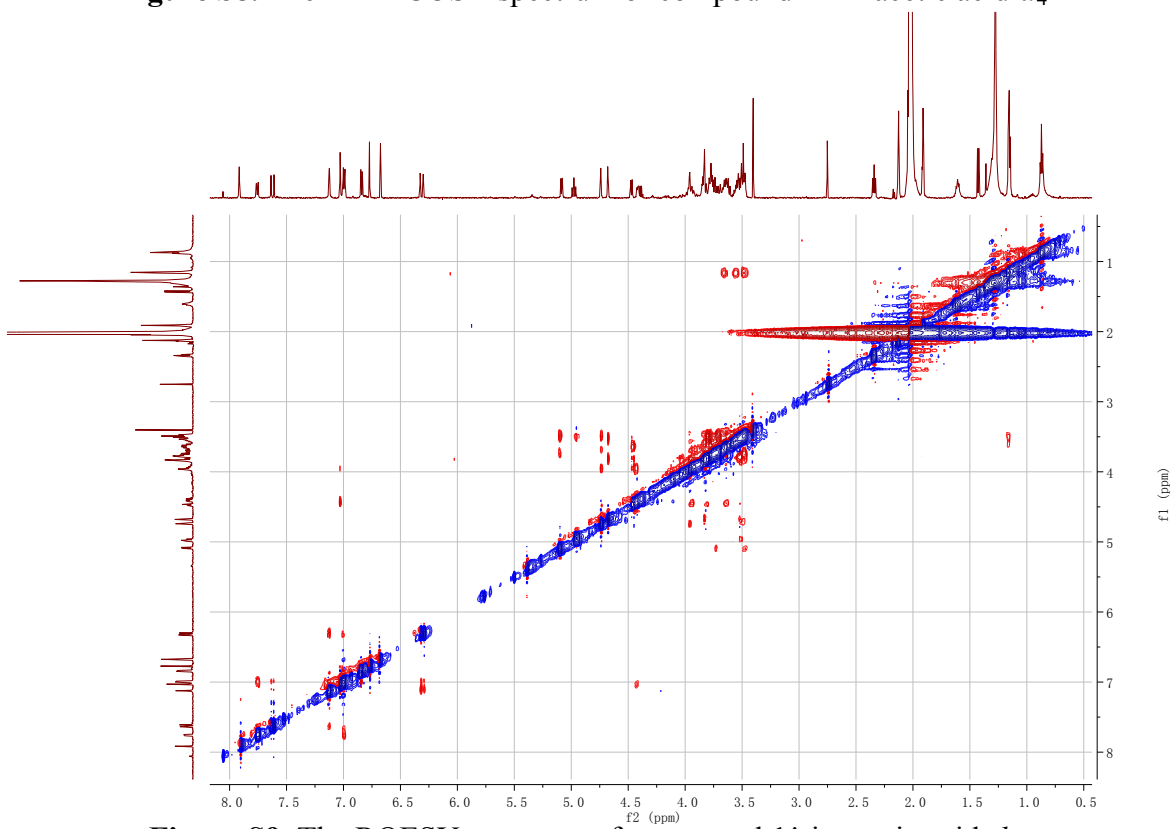

**Figure S9.** The ROESY spectrum of compound **1\*** in acetic acid- $d_4$



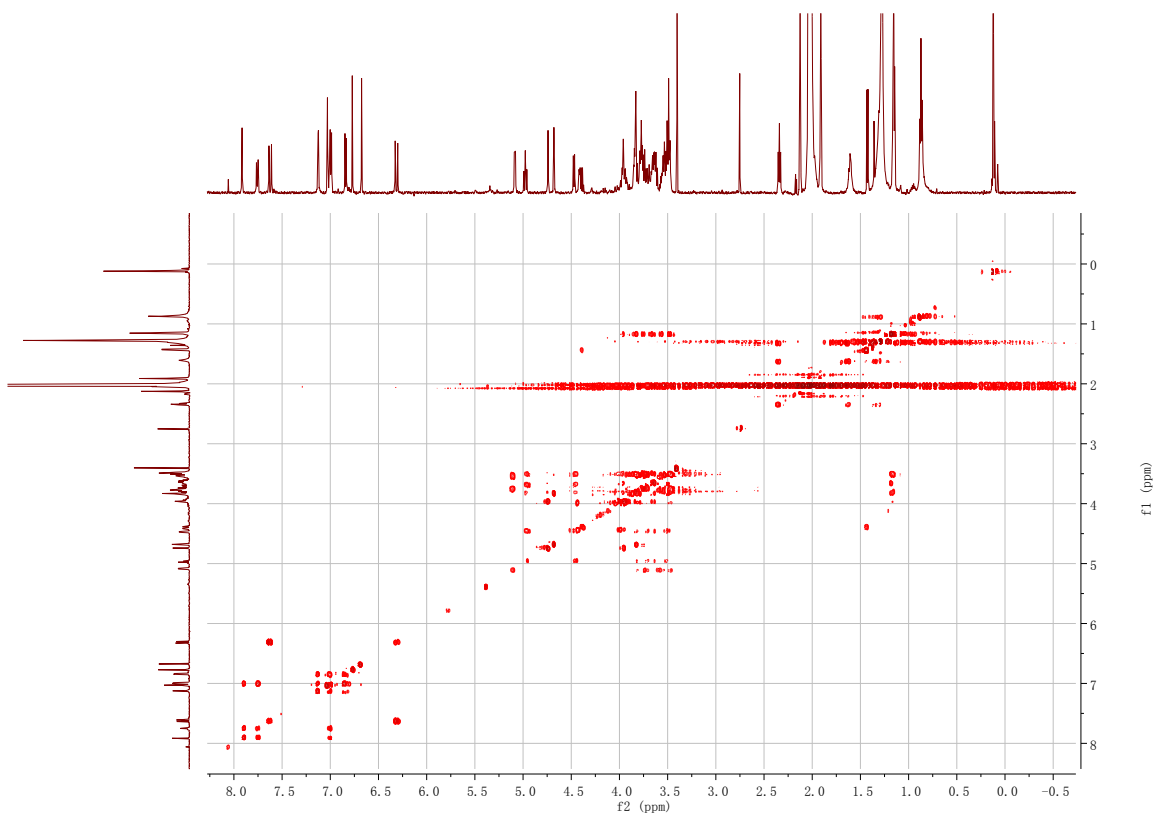

**Figure S10.** The TOCSY spectrum of compound **1\*** in acetic acid- $d_4$

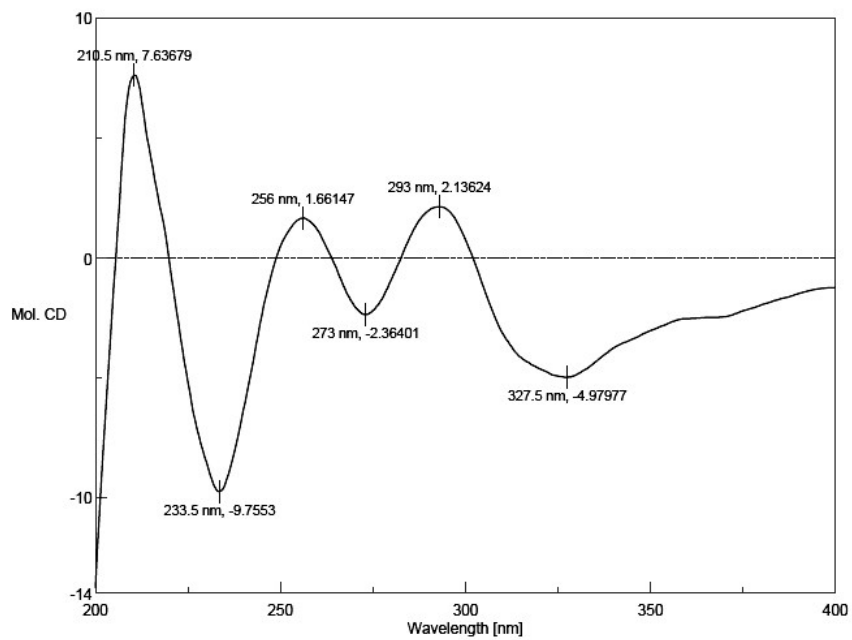

**Figure S11.** The CD spectrum of **1\*** in MeOH

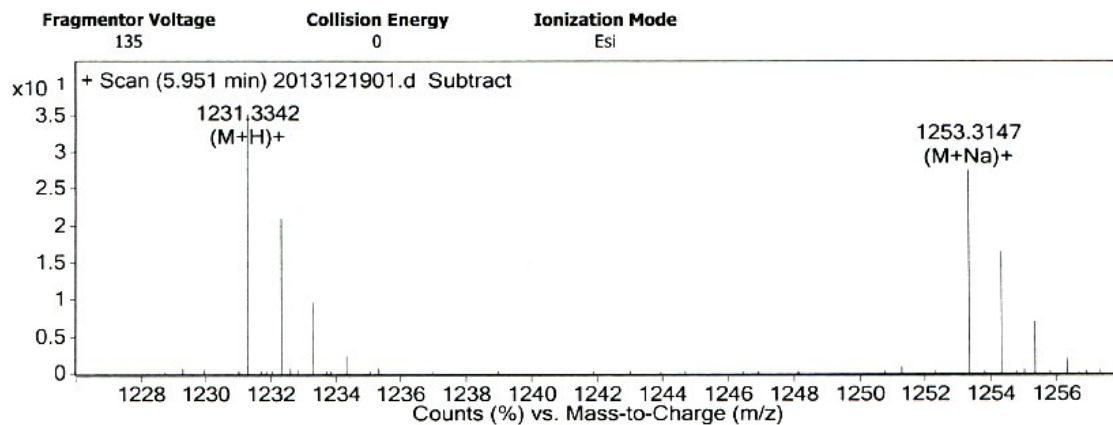

**Figure S12.** The HRESIMS of compound 1\*

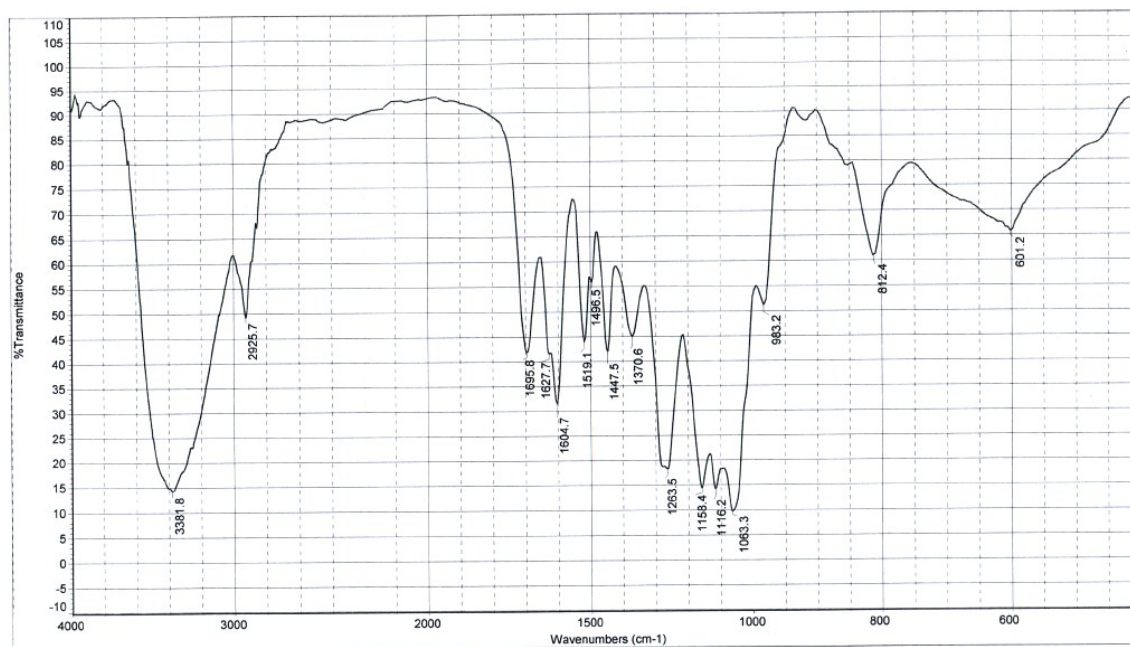

**Figure S13.** The IR spectrum of compound 2\*

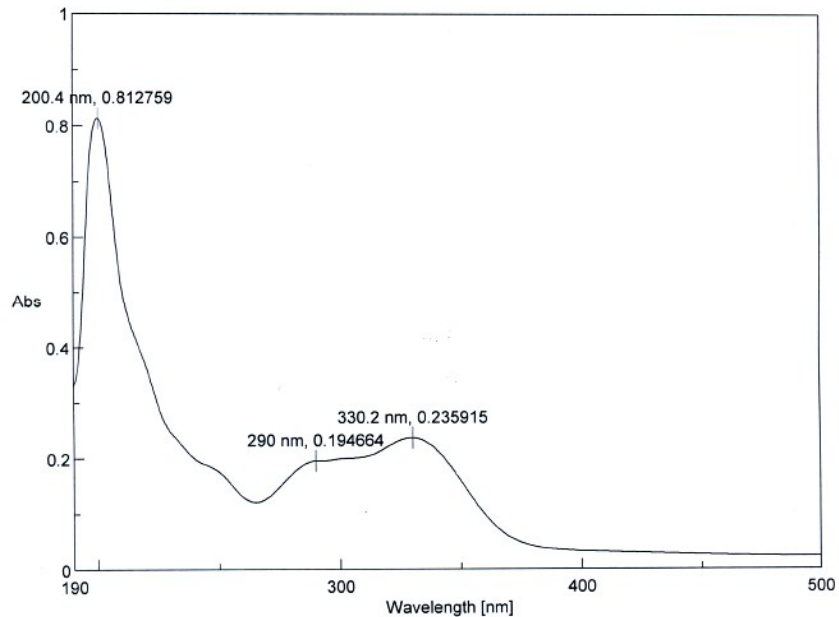

Figure S14. The UV spectrum of compound 2\*

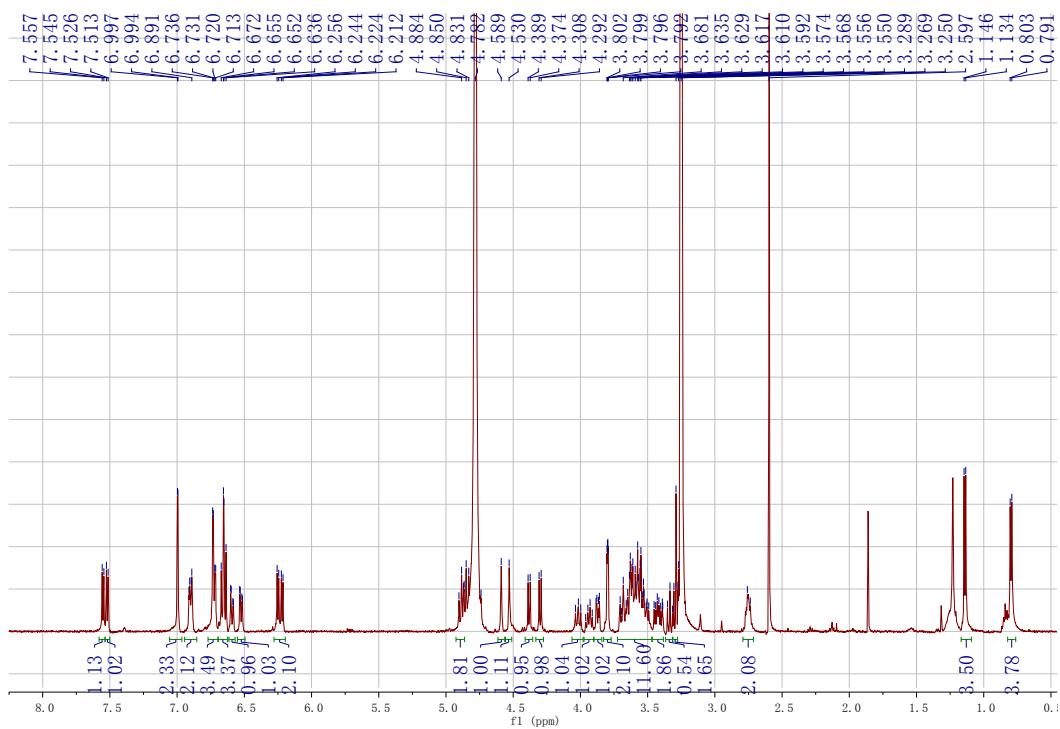

Figure S15. The <sup>1</sup>H NMR spectrum of compound 2\* in methanol-*d*<sub>4</sub>

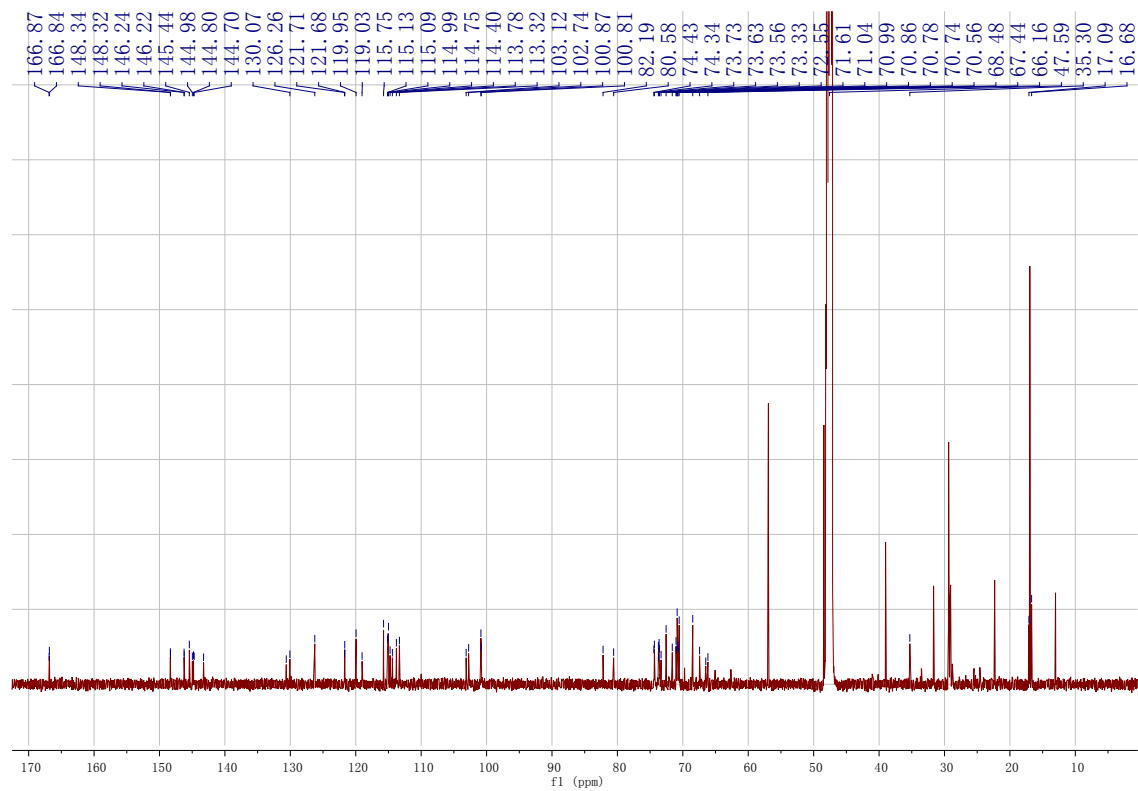

Figure S16. The  $^{13}\text{C}$  NMR spectrum of compound **2\*** in methanol- $d_4$

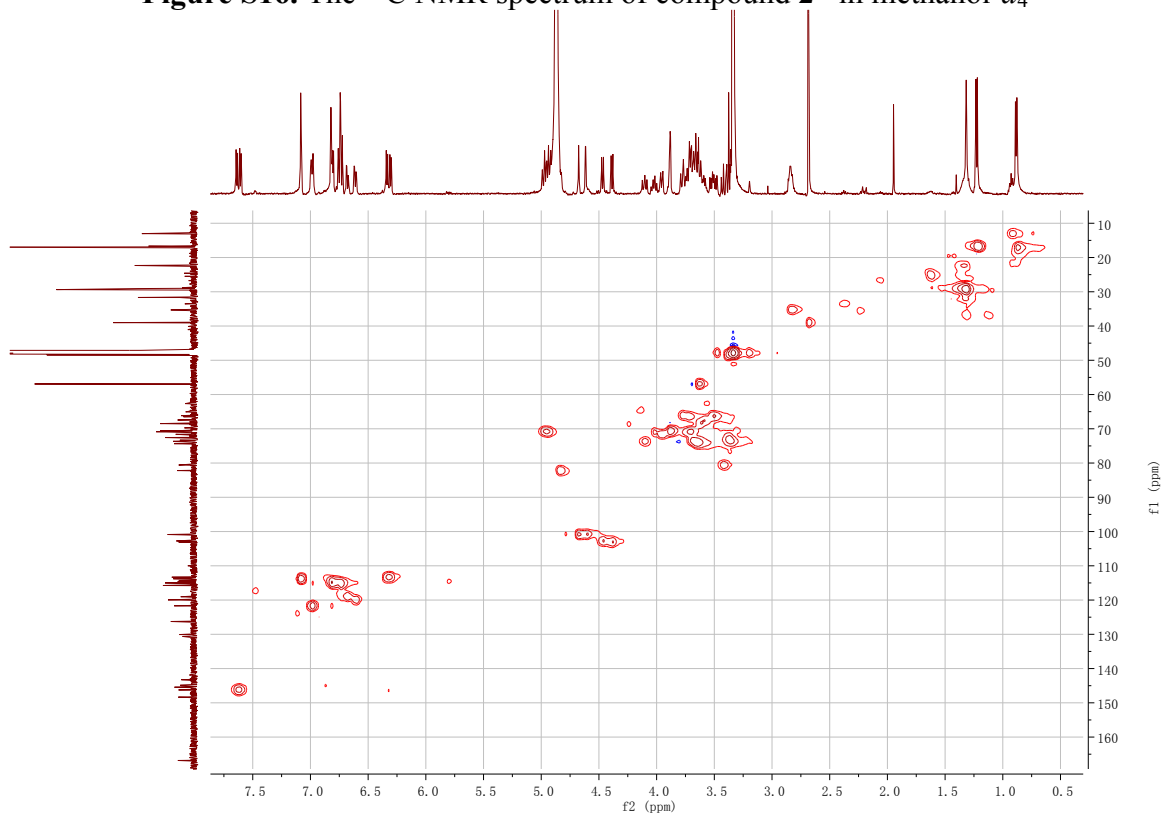

Figure S17. The HSQC spectrum of compound **2\*** in methanol- $d_4$

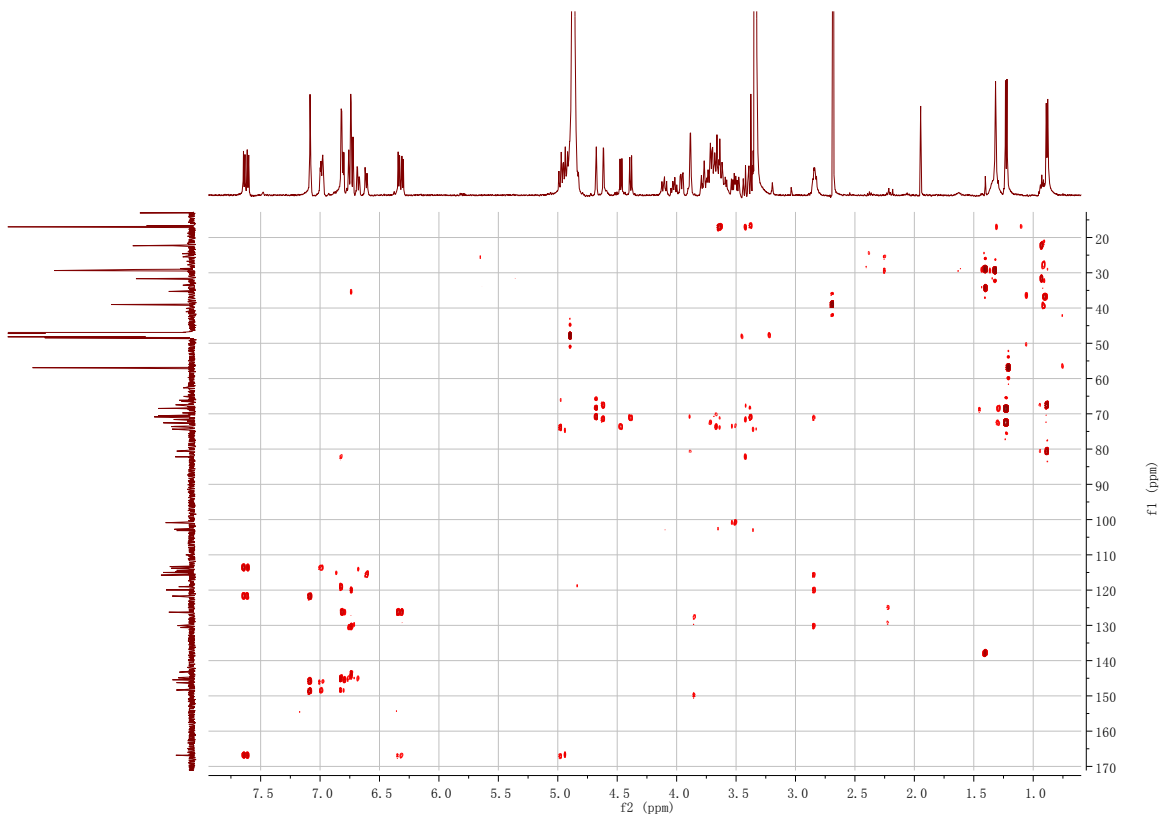

**Figure S18.** The HMBC spectrum of compound **2\*** in methanol- $d_4$

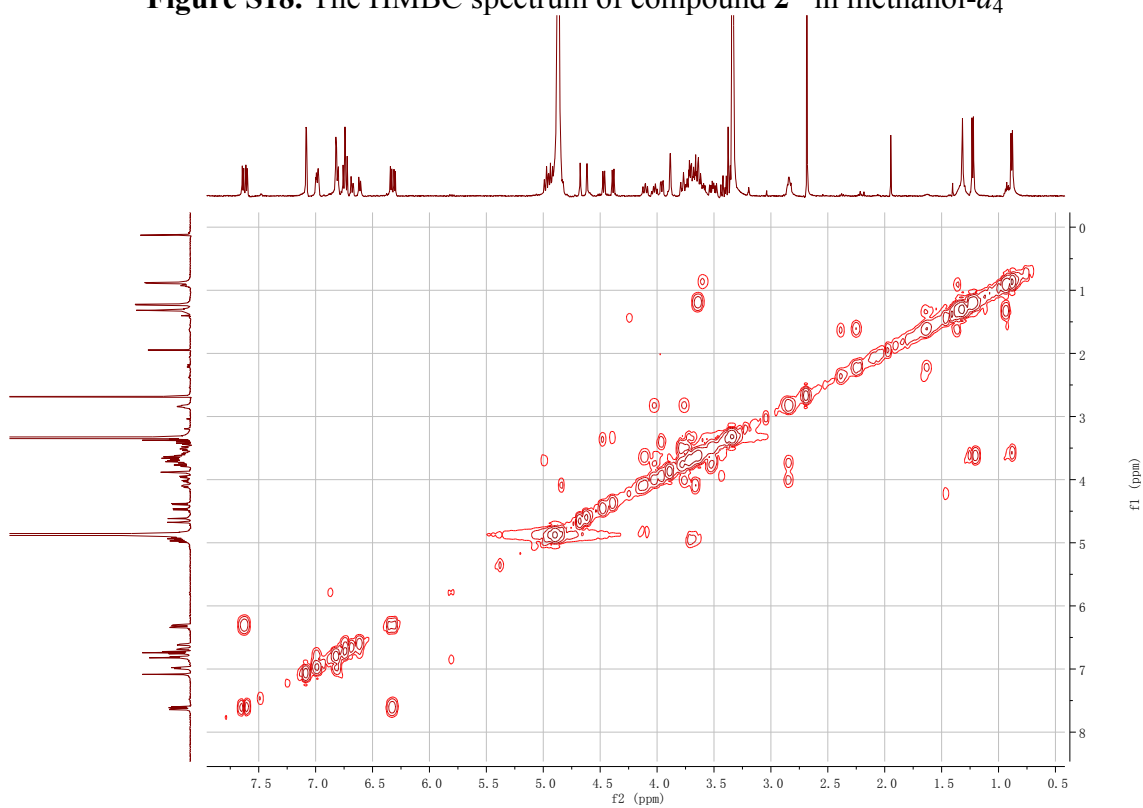

**Figure S19.** The  $^1\text{H}$ - $^1\text{H}$  COSY spectrum of compound **2\*** in methanol- $d_4$

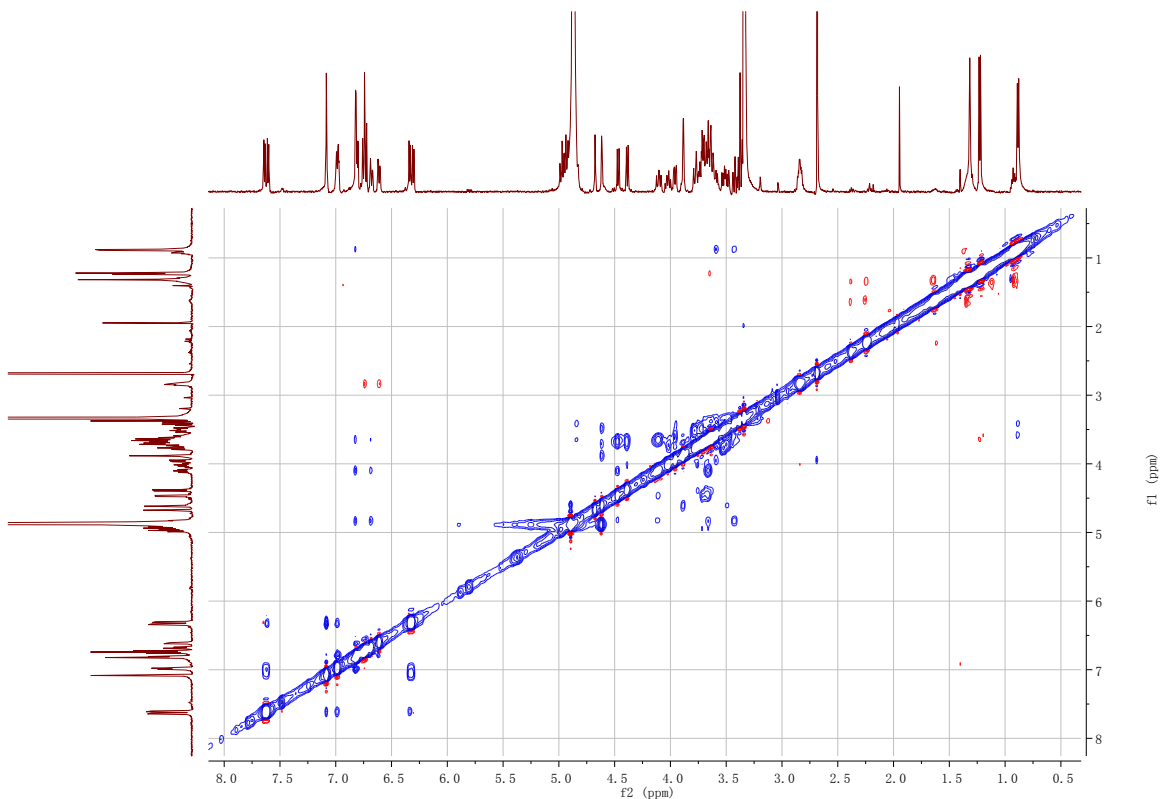

**Figure S20.** The ROESY spectrum of compound **2\*** in methanol- $d_4$

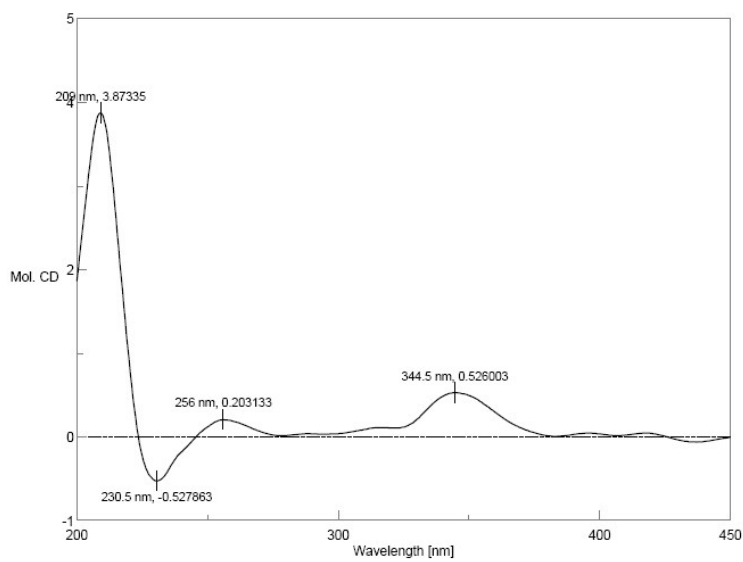

**Figure S21.** The CD spectrum of **2\*** in MeOH : H<sub>2</sub>O 1:1

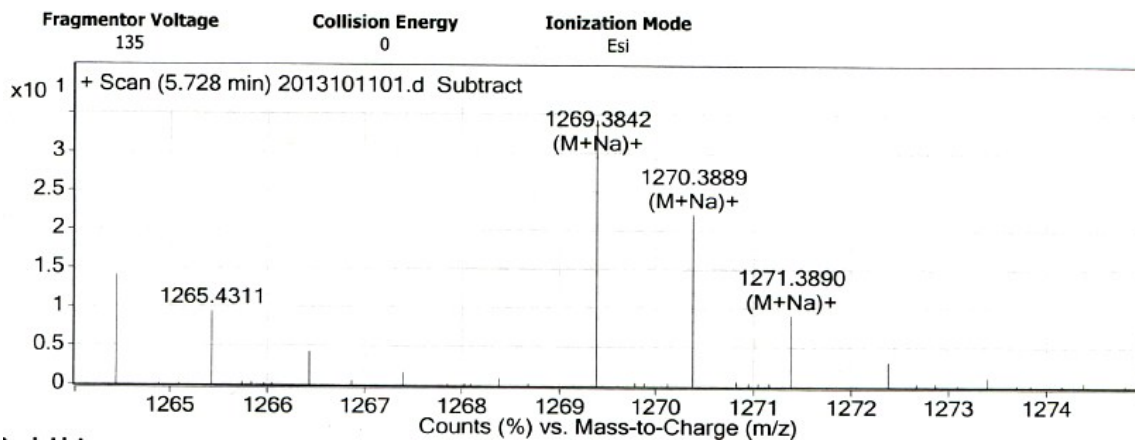

**Figure S22. The HRESIMS of compound 2\***

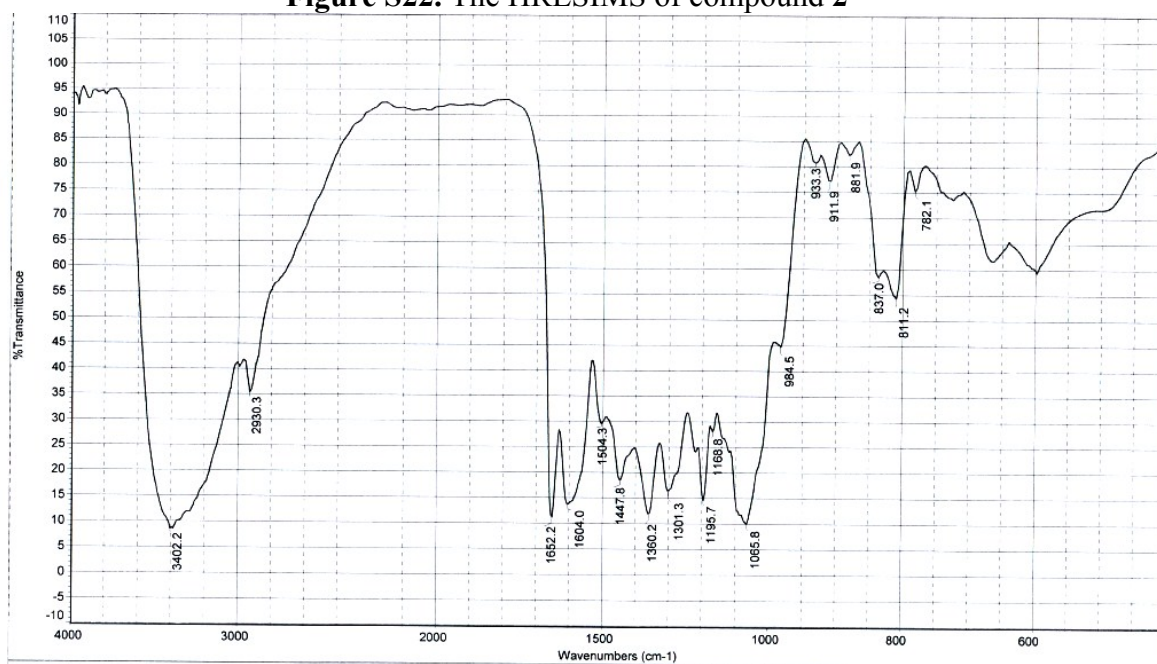

**Figure S23. The IR spectrum of compound 3\***

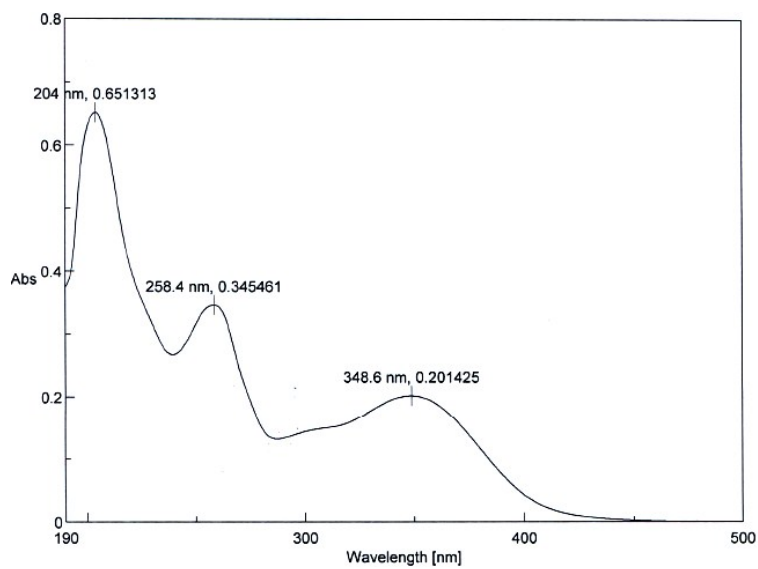

**Figure S24. The UV spectrum of compound 3\***

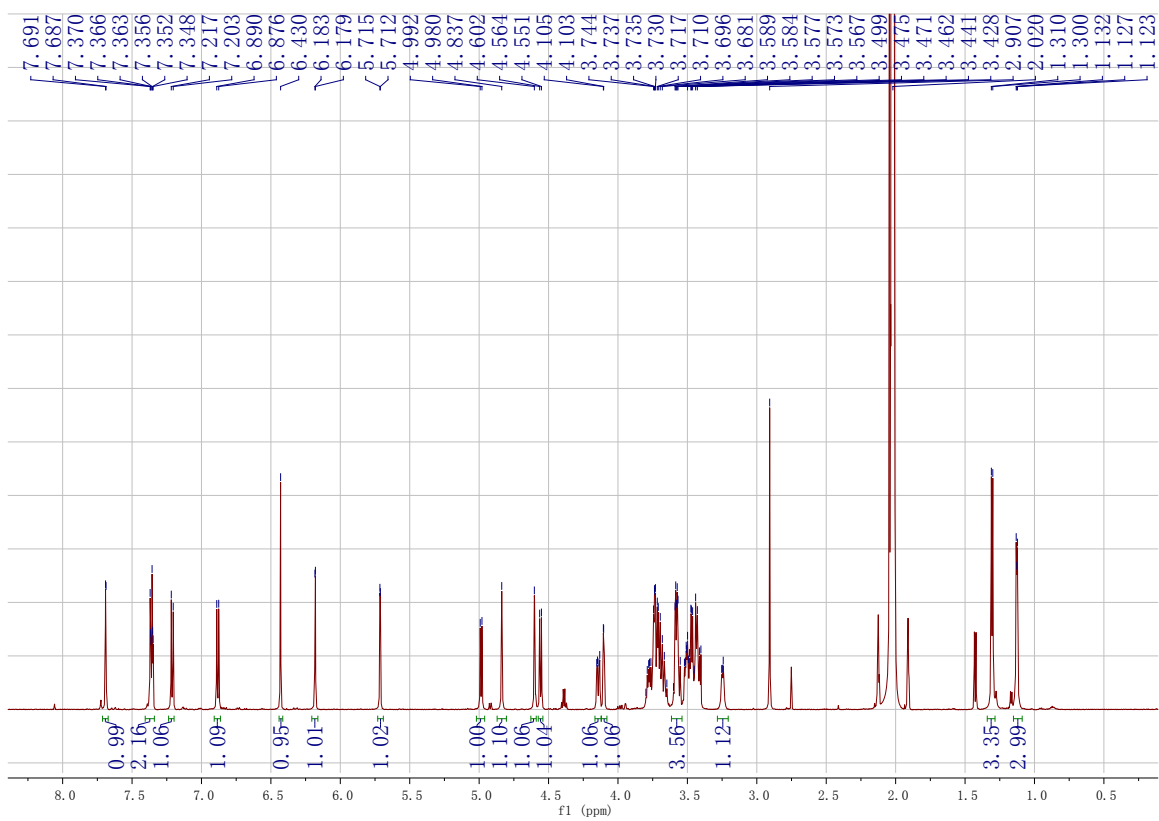

**Figure S25. The <sup>1</sup>H NMR spectrum of compound 3\* in acetic acid-d<sub>4</sub>**



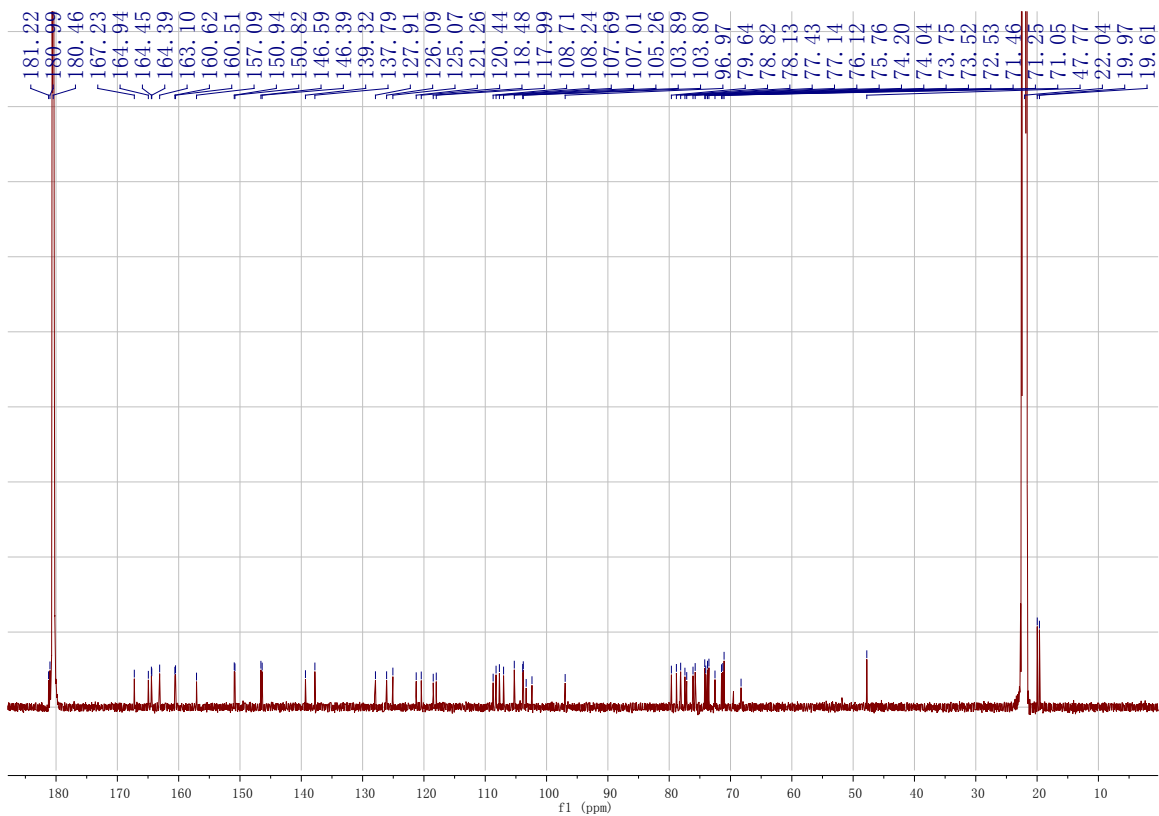

Figure S26. The  $^{13}\text{C}$  NMR spectrum of compound 3\* in acetic acid- $d_4$

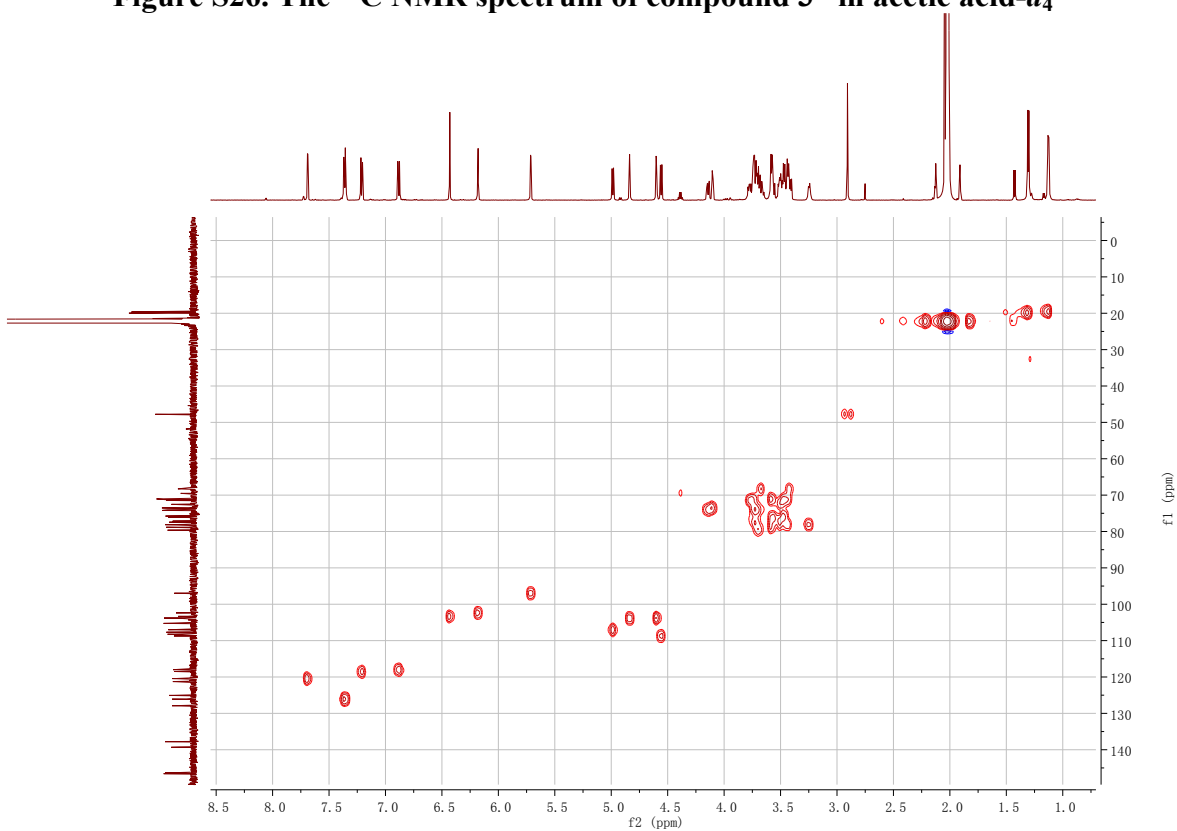

Figure S27. The HSQC spectrum of compound 3\* in acetic acid- $d_4$

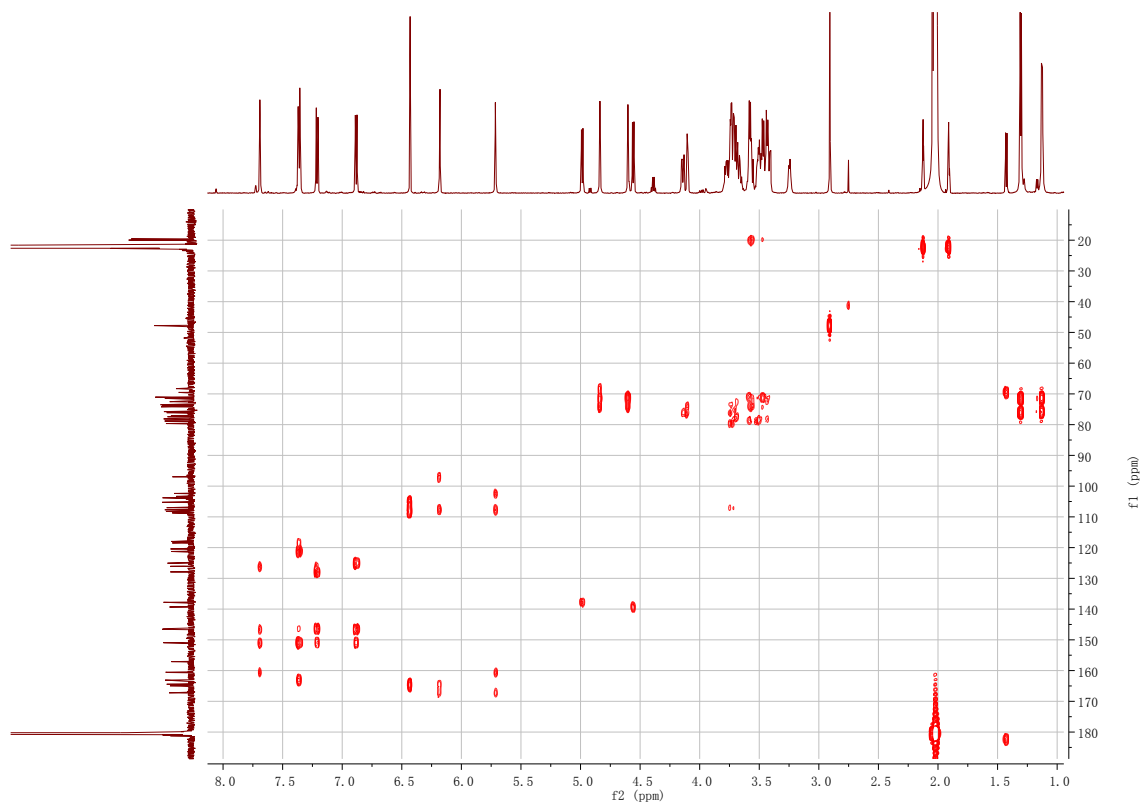

**Figure S28. The HMBC spectrum of compound 3\* in acetic acid- $d_4$**

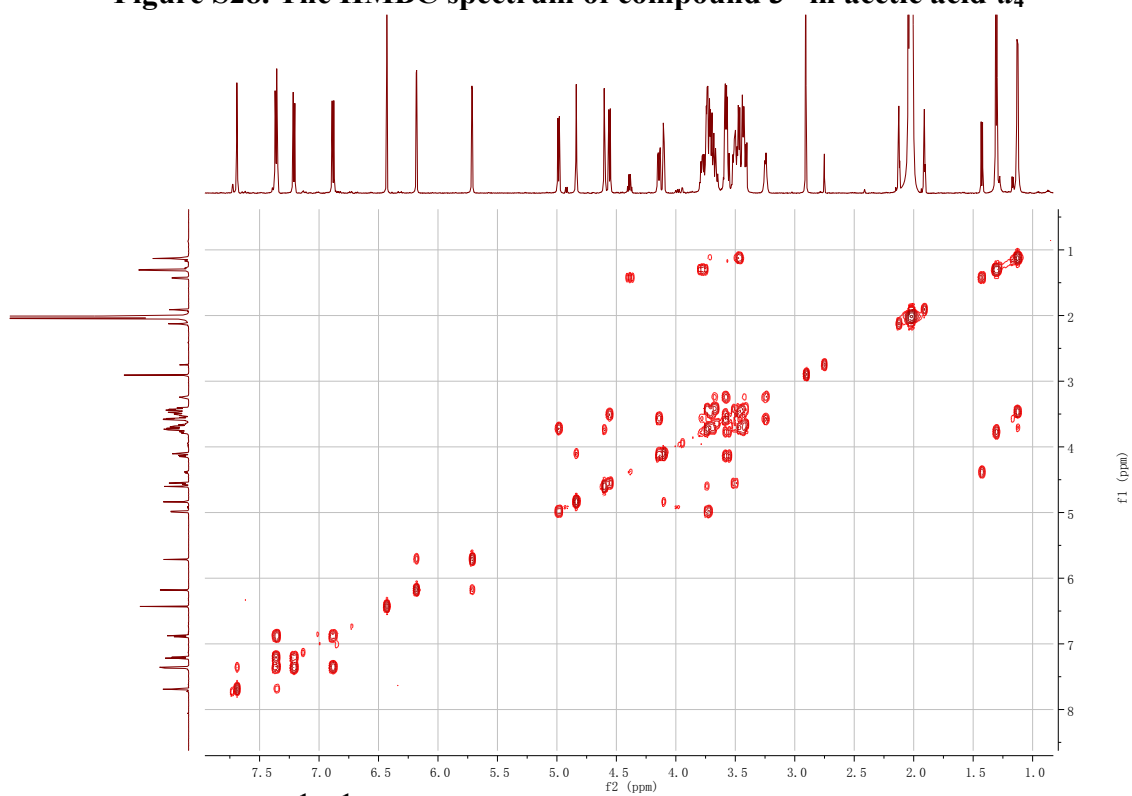

**Figure S29. The  $^1\text{H}$ - $^1\text{H}$  COSY spectrum of compound 3\* in acetic acid- $d_4$**

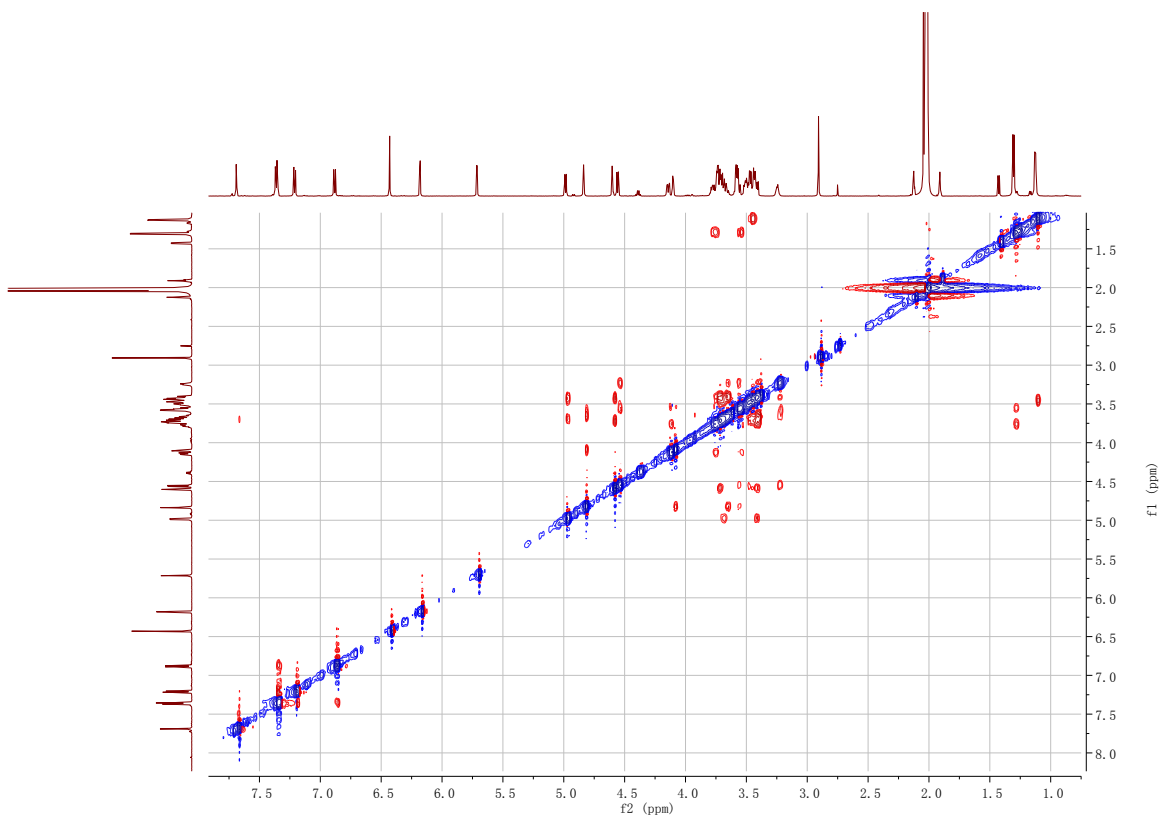

**Figure S30.** The ROESY spectrum of compound **3\*** in acetic acid-*d*<sub>4</sub>

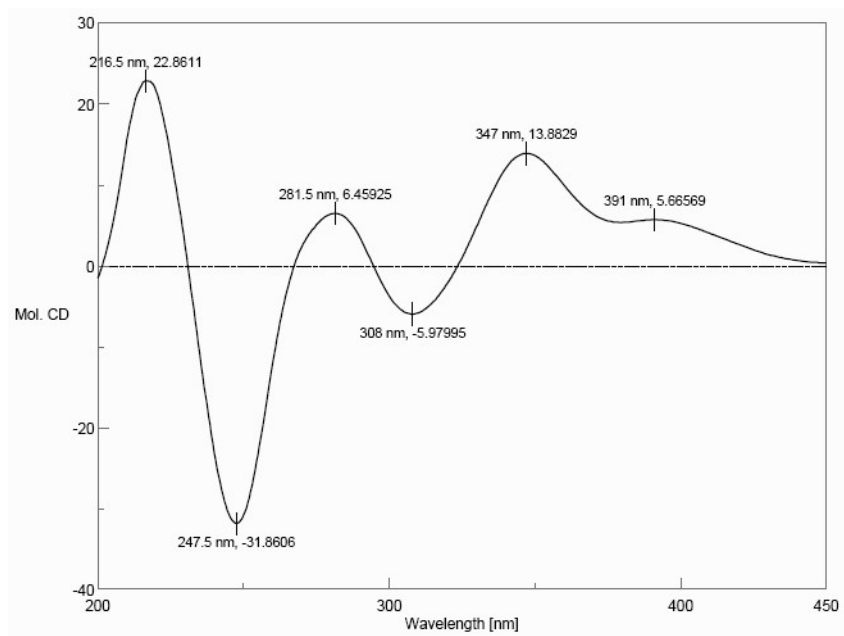

**Figure S31.** The CD spectrum of **3\*** in MeOH : H<sub>2</sub>O 1:1

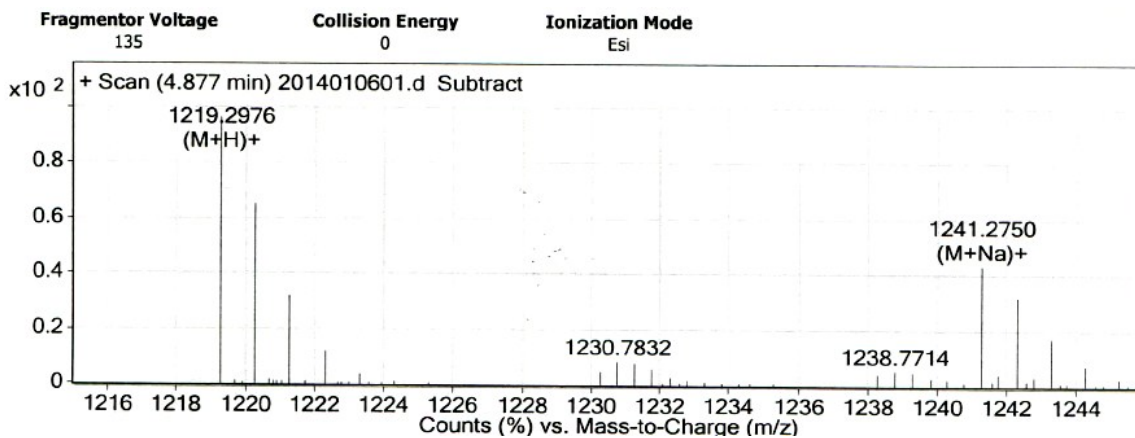

**Figure S32. The HRESIMS of compound 3\***

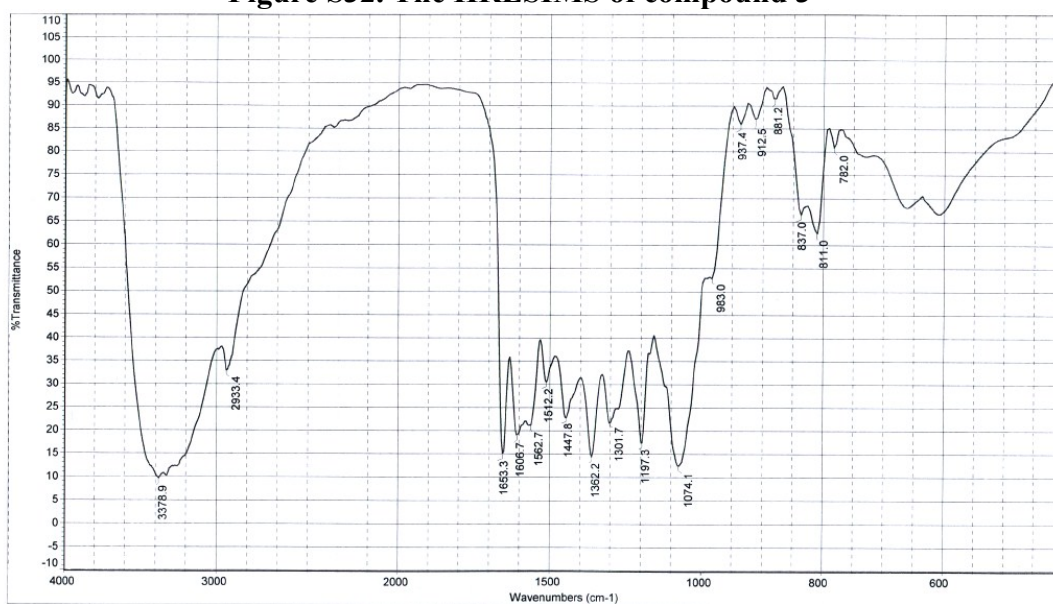

**Figure S33. The IR spectrum of compound 4\***

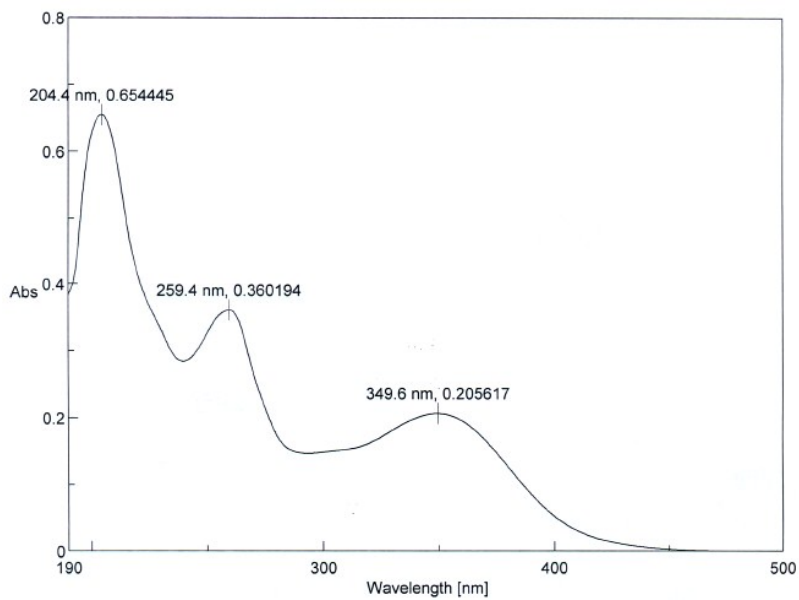

Figure S34. The UV spectrum of compound 4\*

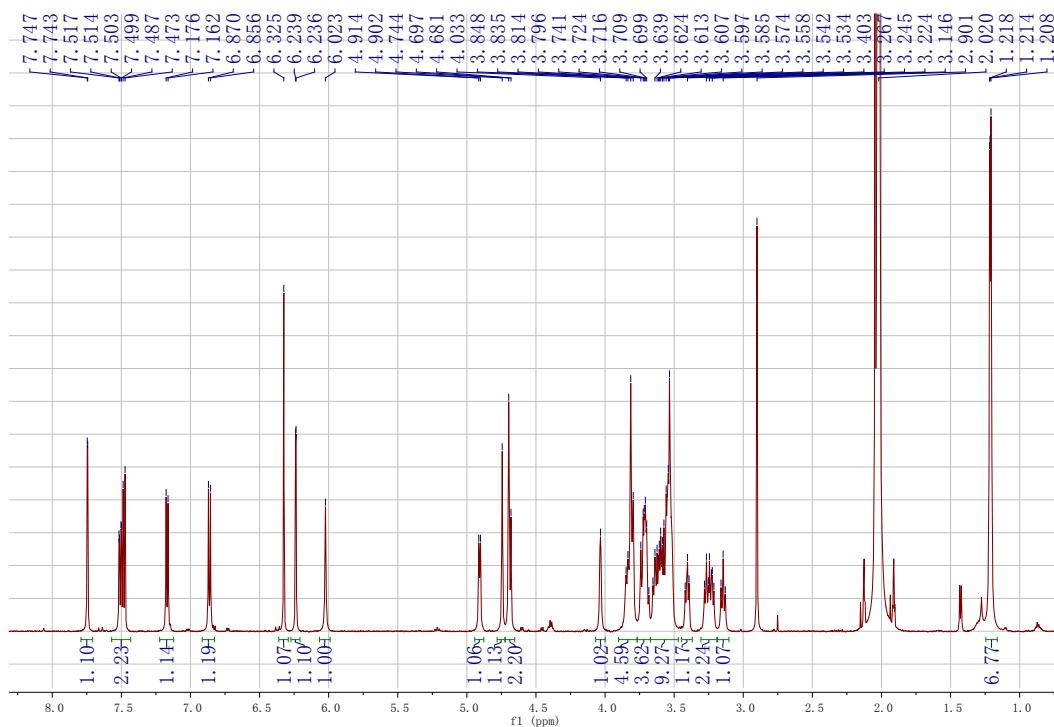

Figure S35. The <sup>1</sup>H NMR spectrum of compound 4\* in acetic acid-*d*<sub>4</sub>

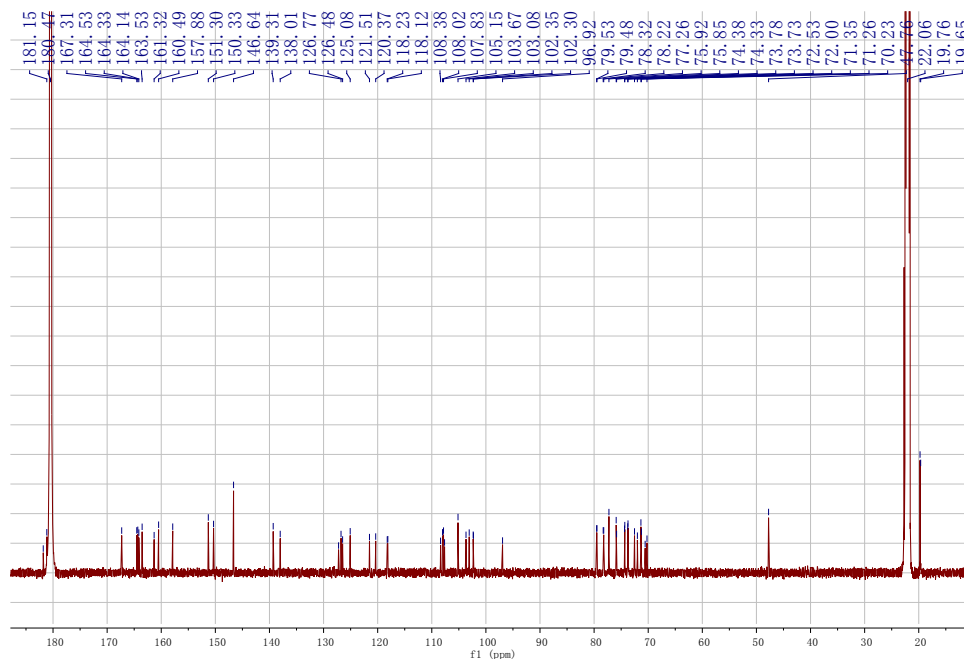

Figure S36. The  $^{13}\text{C}$  NMR spectrum of compound  $4^*$  in acetic acid- $d_4$

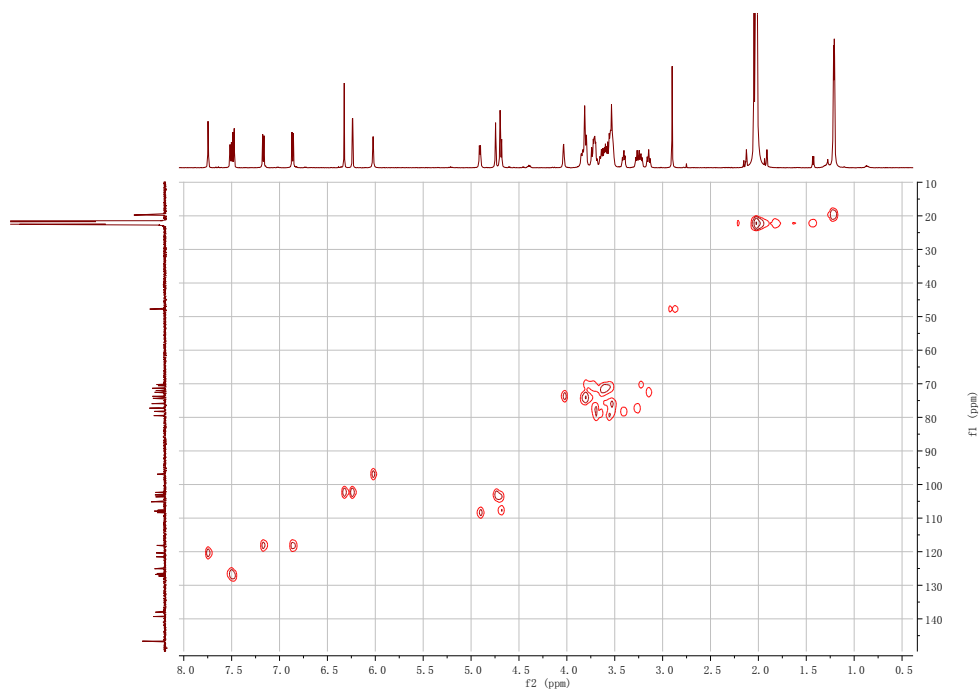

Figure S37. The HSQC spectrum of compound  $4^*$  in acetic acid- $d_4$

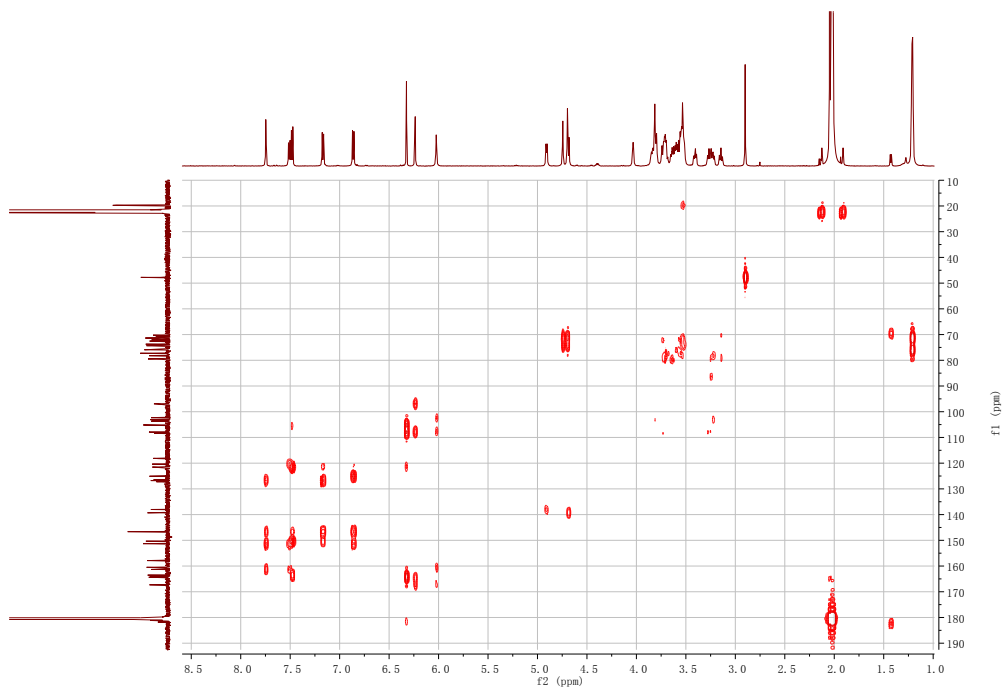

**Figure S38. The HMBC spectrum of compound 4\* in acetic acid- $d_4$**

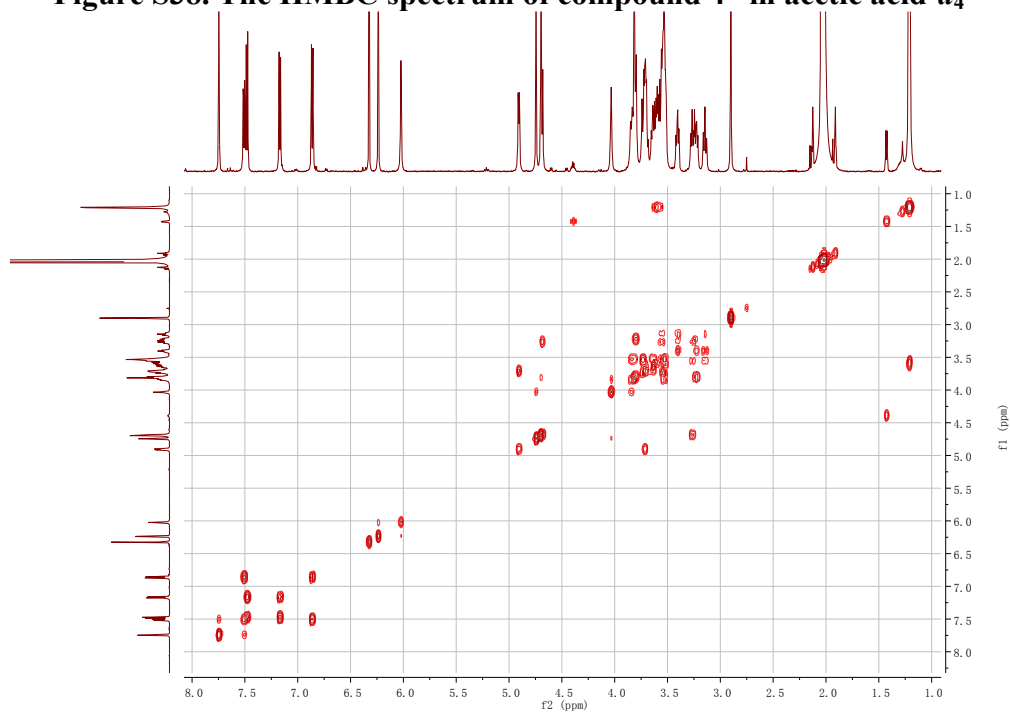

**Figure S39. The  $^1\text{H}$ - $^1\text{H}$  COSY spectrum of compound 4\* in acetic acid- $d_4$**

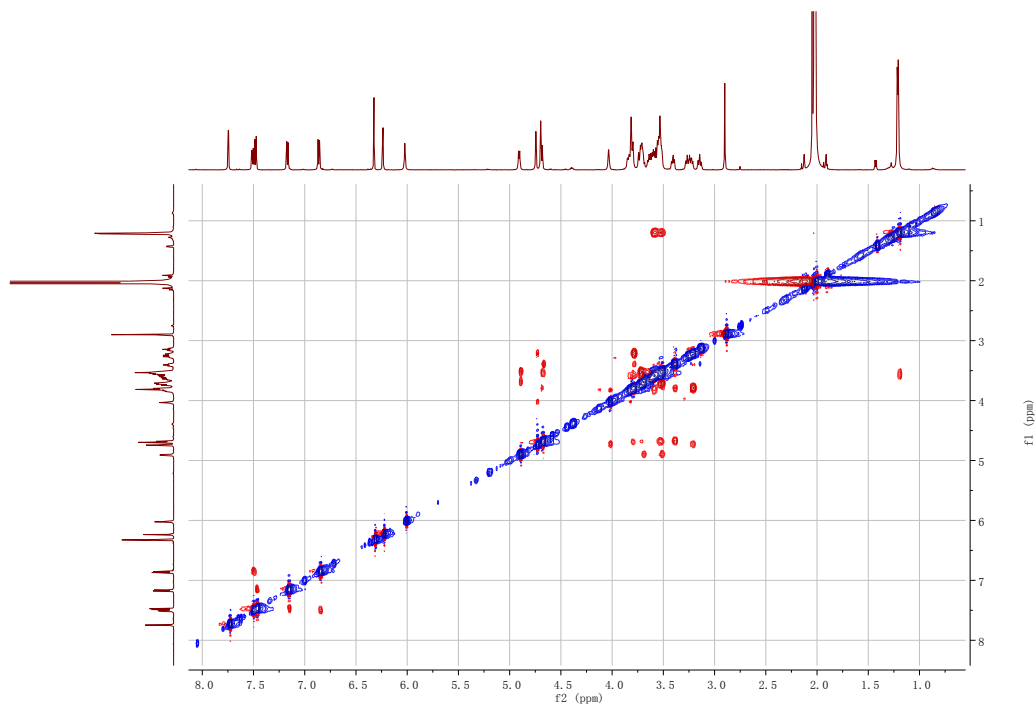

**Figure S40. The ROESY spectrum of compound 4\* in acetic acid- $d_4$**

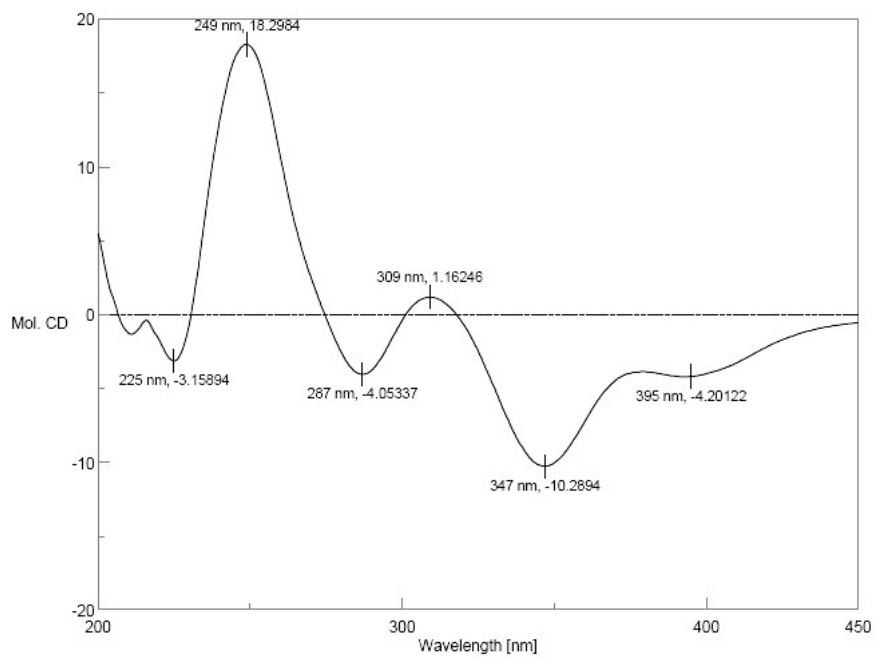

**Figure S41. The CD spectrum of 4\* in MeOH : H<sub>2</sub>O 1:1**



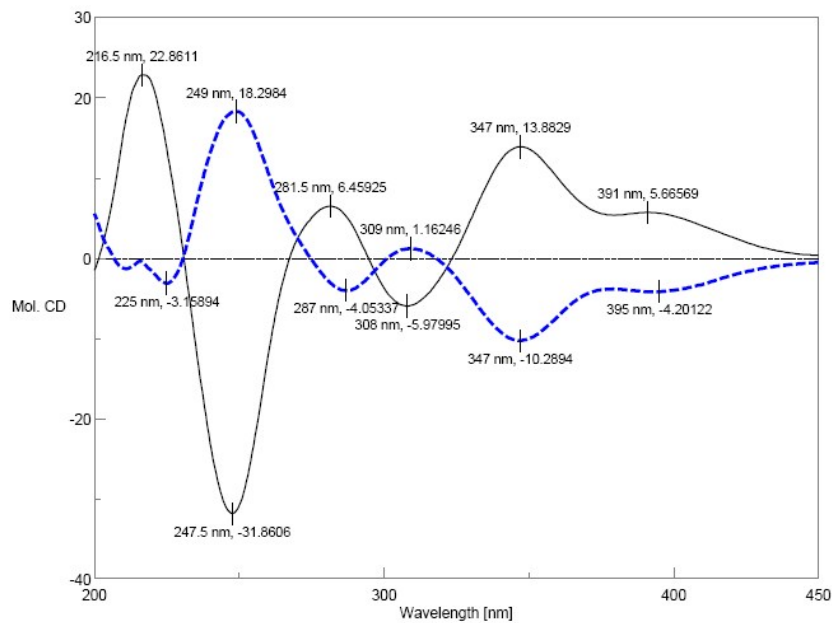

**Figure S42. The overlay CD spectrum of 3\* and 4\***

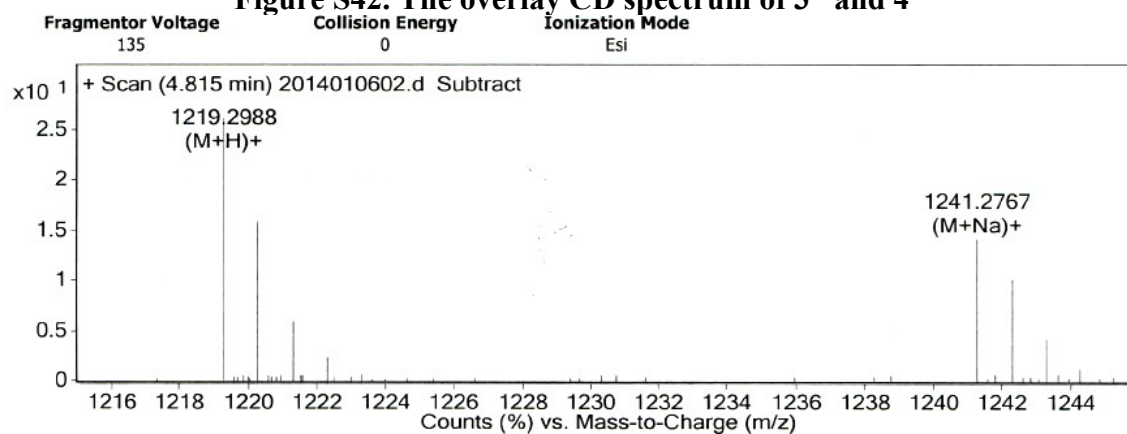

**Figure S43. The HRESIMS of compound 4\***
